# Supplementary material for: Total and different dietary fiber subtypes and the risk of all-cause, cardiovascular, and cancer mortality: a dose–response meta-analysis of prospective cohort studies
Source: Royal Society of Chemistry journal article supplement (doi:10.1039/d2fo04024g), 2023-01-01
Supplement: d2fo04024g1.pdf [file d2fo04024g1.pdf]

**Total and Different Dietary Fiber Sources and the Risk of All-cause, Cardiovascular, and Cancer Mortality: A Dose-Response Meta-Analysis of Prospective Cohort Studies**

*Amin Mirrafiei<sup>1</sup>, Ahmad Jayedi<sup>1</sup>, Sakineh Shab-Bidar<sup>1\*</sup>*

*<sup>1</sup> Department of Community Nutrition, School of Nutritional Sciences and Dietetics, Tehran University of Medical Sciences, Tehran, Iran*

**\*Corresponding author:** Sakineh Shab-Bidar,  
Associate Professor, Department of Community Nutrition, School of Nutritional Sciences and Dietetics, Tehran University of Medical Sciences (TUMS), Tehran, Iran. No 44, Hojjat-dost Alley, Naderi St., Keshavarz Blvd, **P. O. Box 14155/6117**, Tehran, Iran. Tel: +98-21- 88955975. Fax: +98-21- 88974462. E-mail address: s\_shabbidar@tums.ac.ir

**Supplemental Materials including Supplemental Tables 1-6 and Supplemental Figures 1-24**

**Supplemental Table 1.** List of studies excluded via full text screening (n=60).

|                                     |
|-------------------------------------|
| Not relevant exposure (n=38) (1-38) |
| Not relevant outcome (n=7) (39-45)  |
| Review (n=6) (46-51)                |
| No risk estimate (n=4) (52-55)      |
| Duplicate (4) (56-59)               |
| In patients (n=1) (60)              |

## Supplementary Information

**Supplemental Table 2.** Characteristics of prospective cohort studies included in meta-analysis of dietary fiber and risk of mortality.

| <b>Reference, year, Country</b> | <b>Study name</b>                                               | <b>Follow-up (years)</b> | <b>Female (%)</b> | <b>Participants</b> | <b>Outcome (cases)</b>                                          | <b>Exposure</b>                                                                                       | <b>Dietary assessment tool</b> | <b>Age range, mean age (years)</b> | <b>Adjustments</b>                                                                                                                                                                                                                                                                                                                                                   |
|---------------------------------|-----------------------------------------------------------------|--------------------------|-------------------|---------------------|-----------------------------------------------------------------|-------------------------------------------------------------------------------------------------------|--------------------------------|------------------------------------|----------------------------------------------------------------------------------------------------------------------------------------------------------------------------------------------------------------------------------------------------------------------------------------------------------------------------------------------------------------------|
| Atkins, 2014 (21), UK           | The British Regional Heart Study                                | 11.3                     | 0%                | 3328                | All-cause death (933)<br>CVD death (327)                        | Total fiber                                                                                           | FFQ                            | 60-79 (68)                         | Age, energy intake, smoking, alcohol, physical activity, social class, BMI, and a modified version of the HDI/EDI score not containing the individual component of interest.                                                                                                                                                                                         |
| Bazelmans, 2006 (22), Belgium   | Belgian Interuniversity Research on Nutrition and Health' study | 10                       | 47%               | 11,193              | All-cause death (1019)                                          | Total fiber                                                                                           | One day food record            | 25-74 (49)                         | Age, educational level, antecedents of an infarction, hypertension, diabetes, tobacco addiction, alcohol consumption, cholesterol/HDL-C ratio and obesity                                                                                                                                                                                                            |
| Dominguez, 2018 (23), Spain     | Seguimiento Universidad de Navarra" (SUN) project               | 10.1                     | 61%               | 19,703              | All-cause death (323)                                           | Total fiber, fruit fiber, vegetable fiber, legume fiber, cereal fiber, soluble fiber, insoluble fiber | FFQ                            | 37.5                               | Age, sex, marital status, BMI, smoking, alcohol, physical activity, hours per day spent watching television, baseline hypercholesterolemia, baseline HTN, history of depression, history of CVD, history of cancer, history of diabetes, following special diets at baseline, snacking between meals, sugar-sweetened beverages consumption, and total energy intake |
| Katagiri, 2020 (24), Japan      | Japan Public Health Center-based prospective study              | 16.8                     | 54%               | 92,924              | All-cause death (19,400), Cancer death (7080), CVD death (4900) | Total fiber, vegetable fiber, cereal fiber, fruit fiber, beans fiber, insoluble, soluble fiber        | FFQ                            | 45-74 (57)                         | Age, area, BMI, smoking status, alcohol intake, sports or physical exercise during leisure time, hypertension with medication, self-reported diabetes with and without medication, health check-up, amount of green tea intake, coffee intake, salt intake, menopausal status, and exogenous hormone use (yes or no, only for women).                                |
| Miyazawa, 2019 (25), Japan      | NIPPON DATA80                                                   | 24                       | 56%               | 8925                | CVD death (823)                                                 | Total fiber                                                                                           | Weighted food record           | 30-79 (50)                         | Age, smoking status, drinking status, BMI, medication of HTN, past history of diabetes mellitus, sodium, saturated fatty acids, long-chain n-3 poly-                                                                                                                                                                                                                 |

Supplementary Information

|                              |                                                        |    |       |         |                                                                   |                                                                                                       |                     |            |                                                                                                                                                                                                                                                                                                                                                                                 |
|------------------------------|--------------------------------------------------------|----|-------|---------|-------------------------------------------------------------------|-------------------------------------------------------------------------------------------------------|---------------------|------------|---------------------------------------------------------------------------------------------------------------------------------------------------------------------------------------------------------------------------------------------------------------------------------------------------------------------------------------------------------------------------------|
| Partula, 2020 (26)<br>France | NutriNet-Santé prospective cohort                      | 5  | 78.7% | 107,377 | All-cause death (635)                                             | Total fiber, soluble fiber, insoluble fiber, vegetable fiber, fruit fiber, legume fiber, cereal fiber | Dietary record      | >18 (43)   | unsaturated fatty acids, and available carbohydrate<br>Age, sex, educational level, BMI, physical activity, smoking status, alcohol intake, energy intake, and number of 24-h dietary records, for all-cause mortality: family history of cancer and CVD, and the personal history of cancer, CVD, and T2D.                                                                     |
| Akbaraly, 2011 (41),<br>UK   | Whitehall II cohort                                    | 18 | 30.3% | 7319    | All-cause death (534)<br>CVD death (141)                          | Total fiber                                                                                           | FFQ                 | 39-63 (50) | Age, sex, ethnicity, occupational grade, marital status, smoking status, total energy intake, physical activity, BMI categories, prevalent CVD, type 2 diabetes, hypertension, dyslipidemia, metabolic syndrome, and inflammatory markers                                                                                                                                       |
| Eshak, 2010 (42),<br>Japan   | Japan Collaborative Cohort Study                       | 14 | 60%   | 58730   | CVD death (2080)                                                  | Total fiber, soluble fiber, insoluble fiber, cereal fiber, vegetable fiber, fruit fiber               | FFQ                 | 40-79 (56) | Age, BMI, history of HTN, history of diabetes, alcohol consumption, smoking, education level, hours of exercise, hours of walking, perceived mental stress, sleep fish, SFA, (n-3) fatty acids, sodium, folate, and vitamin E, other types of dietary fiber (cereal, fruit, and vegetable fibers)                                                                               |
| Baer, 2011 (43),<br>US       | The Nurses' Health Study                               | 18 | 100%  | 50,112  | All-cause death (4893)<br>CVD death (1026)<br>Cancer death (2361) | Cereal fiber                                                                                          | FFQ                 | 30-55 (53) | Age, glycemic load, dietary cholesterol, systolic blood pressure, use of blood pressure medications, personal history of diabetes, parental MI before age 60 years, time since menopause, polyunsaturated fat nut consumption, BMI at age 18 years, weight change since age 18 years (per 23 kg), height, Smoking status, smoking status, physical activity, and alcohol intake |
| Bazzano, 2003 (44),<br>US    | The National Health and Nutrition Examination Survey I | 19 | 61%   | 9776    | All-cause death (2632)<br>CVD death (1198)                        | Total fiber, soluble fiber                                                                            | 24-h dietary recall | 25-74 (49) | Age, sex, race, educational level, systolic blood pressure, serum total cholesterol level, diabetes mellitus, physical activity, regular alcohol                                                                                                                                                                                                                                |

Supplementary Information

|                                 |                                                                     |       |       |         |                                                                      |                                                         |                     |             |                                                                                                                                                                                                                                                                                                       |
|---------------------------------|---------------------------------------------------------------------|-------|-------|---------|----------------------------------------------------------------------|---------------------------------------------------------|---------------------|-------------|-------------------------------------------------------------------------------------------------------------------------------------------------------------------------------------------------------------------------------------------------------------------------------------------------------|
|                                 | Epidemiologic Follow-up Study                                       |       |       |         |                                                                      |                                                         |                     |             | consumption, smoking status, BMI and saturated fat intake                                                                                                                                                                                                                                             |
| Buil-Cosiales, 2014 (45), Spain | Prevenio´n con Dieta Mediterra´nea (PREDIMED) study                 | 5.9   | 57%   | 7216    | All-cause death (425)<br>CVD death (103)<br>Cancer death (169)       | Total fiber                                             | FFQ                 | 55-80 (67)  | Age, sex, smoking status, diabetes, BMI, baseline systolic and diastolic arterial blood pressures, statins, alcohol intake, educational level, physical activity, and total energy intake                                                                                                             |
| Buyken, 2010 (46), Australia    | The Blue Mountains Eye Study                                        | 13    | 54%   | 2735    | CVD death (260)                                                      | Total fiber, vegetable fiber, fruit fiber, cereal fiber | FFQ                 | >49 (64)    | Women: Age, energy, dietary glycemic index residuals, alcohol consumption, current smoking, and presence of diabetes at baseline;<br>Men: Age, energy, dietary glycemic index residual, total fat intake, whether underweight, current smoking, and use of corticosteroid drugs at baseline.          |
| Chan, 2016 (47), US             | The National Health and Nutrition Examination Survey III            | 13.74 | 53.4% | 15,740  | All-cause death (3164)<br>Cancer death (656)                         | Total fiber, soluble fiber, insoluble fiber             | 24-h dietary recall | >20 (45)    | Age, sex, race, marital status, education level, energy intake, folate intake, body mass index, alcohol consumption, smoking status and physical activity frequency per week                                                                                                                          |
| Chuang, 2012 (48), Europe       | European Prospective Investigation into Cancer and Nutrition cohort | 12.7  | 71%   | 452,717 | All-cause death (23,552)<br>cancer death (9614)<br>CVD death (4604)  | Total fiber, fruit fiber, vegetable fiber, cereal fiber | FFQ                 | 25-70 (50)  | Education, smoking, alcohol consumption, BMI, physical activity, and total energy intake and use of menopausal hormone therapy in women                                                                                                                                                               |
| Gopinath, 2016 (49), Australia  | The Blue Mountains Eye Study                                        | 10    | 56%   | 1609    | All-cause death (610)                                                | Total fiber, vegetable fiber, fruit fiber, cereal fiber | FFQ                 | >49 (64)    | Age, sex, marital status, living status, smoking, weight status, and energy-adjusted total fiber intake                                                                                                                                                                                               |
| Huang, 2015 (50), USA           | The NIH-AARP Diet and Health Study                                  | 14    | 43.9  | 367,442 | All-cause death (46067)<br>Cancer death (19043)<br>CVD death (11283) | Cereal fiber                                            | FFQ                 | 50-71, 61.7 | Age, sex, the number of cigarettes smoked per day, time of smoking cessation, race or ethnicity group, alcohol intake, education level, marital status, health status, obesity, physical activity, consumption of red meat, total fruit and total vegetables, total energy intake, and hormone usage. |

Supplementary Information

|                                  |                                                                    |      |       |         |                                                                     |                                                                       |                                    |             |                                                                                                                                                                                                                                                                                                                                                                                                                                                           |
|----------------------------------|--------------------------------------------------------------------|------|-------|---------|---------------------------------------------------------------------|-----------------------------------------------------------------------|------------------------------------|-------------|-----------------------------------------------------------------------------------------------------------------------------------------------------------------------------------------------------------------------------------------------------------------------------------------------------------------------------------------------------------------------------------------------------------------------------------------------------------|
| Jacobs, 2000 (51), US            | The Iowa Women's Health Study                                      | 11   | 100%  | 10,444  | All-cause death (1240),<br>CVD death (427)<br>Cancer death (527)    | Cereal fiber                                                          | FFQ                                | 55-69, 61.6 | Age, energy intake, educational status, marital status, HTN, diabetes, heart disease, cancer, BMI, WHR, age at first birth, physical activity score, ever smoker, pack years of cigarette smoking, alcohol intake, vitamin supplement use, hormone replacement therapy use, percent of energy from total fat, saturated fat, and carbohydrates, intake per 1000 kcal of fiber from non-grain sources, intake of red meat, and intake of fish and seafood. |
| Lubin, 2003 (52), Israel         | Israel Glucose Intolerance, Obesity and Hypertension cohort study  | 18   | 52%   | 632     | All-cause death (151)<br>Cancer death (34)<br>CVD death (38)        | Total fiber                                                           | FFQ                                | 41-70 (55)  | Age, sex, ethnic origin, smoking status, systolic blood pressure, physical activity, BMI, cholesterol consumption, type of fatty acids, the percentage of energy intake from fat and total energy intake                                                                                                                                                                                                                                                  |
| Mann, 1997 (53), UK              | the Vegetarian Society of the United Kingdom                       | 13.3 | 62%   | 10,802  | All-cause death (392)                                               | Total fiber                                                           | FFQ                                | 16-79 (33)  | Age, sex, smoking and social class for subjects with no evidence of pre-existing disease at the time of recruitment, BMI                                                                                                                                                                                                                                                                                                                                  |
| Nilsson, 2012 (54), Sweden       | Va`sterbotten Intervention Program (VIP) cohort                    | 10   | 51.3% | 77,319  | All-cause death (2383)                                              | Total fiber                                                           | FFQ                                | 40-60 (49)  | Age, BMI, sedentary lifestyle, education, current smoking, intake of alcohol and total energy remaining items in the traditional Sami diet score,                                                                                                                                                                                                                                                                                                         |
| Park, 2011 (55), US              | The NIH (National Institutes of Health)-AARP Diet and Health Study | 9    | 43.5% | 388,122 | All-cause death (31756)<br>CVD death (7665)<br>Cancer death (13171) | Total fiber, vegetable fiber, fruit fiber, beans fiber                | FFQ                                | 50-71 (61)  | Age; race/ethnicity; education; marital status; health status; body mass index; physical activity; smoking status; time since quitting ; smoking dose; alcohol consumption; and intakes of red meat, total fruits and vegetables, and total energy                                                                                                                                                                                                        |
| Streppel, 2008 (56), Netherlands | The Zutphen Study                                                  | 40   | 0%    | 1373    | All-cause death (1048)                                              | Total fiber, cereal fiber, vegetable fiber, fruit fiber, legume fiber | Cross check dietary history method | >49         | Total energy, saturated fat, trans unsaturated fatty acid, and cis polyunsaturated fat intakes; alcohol intake; wine use; fish intake; prescribed diet; the number of cigarettes smoked; duration of cigarette smoking; cigar or                                                                                                                                                                                                                          |

Supplementary Information

|                            |                                                                       |      |       |         |                                                                     |                                                                                                       |                               |            |                                                                                                                                                                                                                                                                                                 |
|----------------------------|-----------------------------------------------------------------------|------|-------|---------|---------------------------------------------------------------------|-------------------------------------------------------------------------------------------------------|-------------------------------|------------|-------------------------------------------------------------------------------------------------------------------------------------------------------------------------------------------------------------------------------------------------------------------------------------------------|
|                            |                                                                       |      |       |         |                                                                     |                                                                                                       |                               |            | pipe smoking; BMI; and socioeconomic status                                                                                                                                                                                                                                                     |
| Threapleton, 2013 (57), UK | The United Kingdom Women's Cohort Study                               | 14.3 | 100%  | 31,036  | CVD death (258)                                                     | Total fiber, cereal fiber, vegetable fiber, fruit fiber, legume fiber, soluble fiber, insoluble fiber | FFQ,                          | 35-69 (50) | Age, BMI, calories from carbohydrate, fat and protein, ethanol intake, METS, smoking status, and socio-economic status                                                                                                                                                                          |
| Todd, 1999 (58), UK        | Scottish Heart Health Study                                           | 7.7  | 50.5% | 11,629  | All-cause death (591)                                               | Total fiber                                                                                           | FFQ                           | 40-59 (50) | Age, serum total cholesterol, systolic blood pressure, energy, previous medical diagnosis of diabetes, body mass index, the Bortner personality score, triglycerides, high density lipoprotein cholesterol, fibrinogen, a self-reported measure of activity in leisure, and alcohol consumption |
| Xu, 2014 (59), Sweden      | Uppsala Longitudinal Study of Adult Men                               | 10   | 0%    | 1110    | All-cause death (300)<br>Cancer death (111)<br>CVD death (138)      | Total fiber                                                                                           | 7-day dietary record          | 70-71 (71) | Age, protein intake, body mass index, smoking, physical activity, education, CVD, diabetes, hyperlipidemia, hypertension, eGFR, UAER, and CRP (cancer history was additionally included in the cancer-related mortality analysis)                                                               |
| Kwon, 2022 (60), Korea     | Korean genome and epidemiology study                                  | 10.1 | 64%   | 143,050 | All-cause death (5436)<br>CVD death (985)                           | Total fiber                                                                                           | FFQ                           | >40 (53.9) | Age, sex, body mass index, smoking, alcohol intake, exercise, total calories, hypertension, diabetes, and dyslipidemia                                                                                                                                                                          |
| Xu, 2022 (61), US          | Prostate, Lung, Colorectal, and Ovarian Cancer (PLCO) Screening Trial | 17.1 | 46%   | 86,642  | All-cause death (17,536)<br>CVD death (4842)<br>Cancer death (5760) | Total fiber, soluble fiber, insoluble fiber                                                           | Dietary history questionnaire | 55-74      | Age, sex, race, body mass index, education, smoking status, marital status, alcohol drinking status, and total energy intake                                                                                                                                                                    |
| You, 2022 (62), Malaysia   | Neuroprotective Model for Healthy Longevity                           | 5    | 52%   | 2322    | All-cause death (336)                                               | Total fiber                                                                                           | Dietary history questionnaire | >60        | Age, sex, marital status and years of education                                                                                                                                                                                                                                                 |

## Supplementary Information

---

**Abbreviations:** BMI, body mass index; CVD, cardiovascular disease; CRP, C-reactive protein; FFQ, food frequency questionnaire; GFR, glomerular filtration rate; HDL, high density lipoprotein cholesterol; HTN, hypertension; MI, myocardial infarction; SFA, saturated fat; UAER, urinary albumin excretion ratio.

---



## Supplementary Information

**Supplemental Table 3.** Quality assessment of prospective cohort studies included in the systematic review and meta-analysis based on ROBINS tool.

| Study                        | Bias due to confounding | Bias due to selection of participants | Bias due to exposure assessment | Bias due to misclassification during follow-up | Bias due to missing data | Bias due to measurement of the outcome | Bias due to selective reporting of the results | Overall judgement |
|------------------------------|-------------------------|---------------------------------------|---------------------------------|------------------------------------------------|--------------------------|----------------------------------------|------------------------------------------------|-------------------|
| Atkins, 2014<br>UK           | Moderate                | Low                                   | Moderate                        | Low                                            | Low                      | Low                                    | Low                                            | Moderate          |
| Bazelmans, 2006,<br>Belgium  | Serious                 | Low                                   | Low                             | Low                                            | Low                      | Low                                    | Low                                            | Serious           |
| Dominguez, 2018,<br>Spain    | Moderate                | Low                                   | Moderate                        | Low                                            | Low                      | Low                                    | Low                                            | Moderate          |
| Katagiri, 2020,<br>Japan     | Moderate                | Low                                   | Moderate                        | Low                                            | Low                      | Low                                    | Low                                            | Moderate          |
| Miyazawa, 2019,<br>Japan     | Serious                 | Low                                   | Low                             | Low                                            | Low                      | Low                                    | Low                                            | Serious           |
| Partula, 2020<br>France      | Moderate                | Low                                   | Low                             | Low                                            | Low                      | Low                                    | Low                                            | Moderate          |
| Akbaraly, 2011<br>UK         | Serious                 | Low                                   | Moderate                        | Low                                            | Low                      | Low                                    | Low                                            | Serious           |
| Eshak, 2010<br>Japan         | Serious                 | Low                                   | Moderate                        | Low                                            | Low                      | Low                                    | Low                                            | Serious           |
| Baer, 2011<br>US             | Serious                 | Low                                   | Moderate                        | Low                                            | Low                      | Low                                    | Low                                            | Serious           |
| Bazzano, 2003,<br>US         | Serious                 | Low                                   | Low                             | Low                                            | Low                      | Low                                    | Low                                            | Serious           |
| Buil-Cosiales, 2014<br>Spain | Moderate                | Low                                   | Moderate                        | Low                                            | Low                      | Low                                    | Low                                            | Moderate          |
| Buyken, 2010<br>Australia    | Serious                 | Low                                   | Moderate                        | Low                                            | Low                      | Low                                    | Low                                            | Serious           |
| Chan, 2016<br>US             | Moderate                | Low                                   | Low                             | Low                                            | Low                      | Low                                    | Low                                            | Moderate          |

Supplementary Information

| Study                         | Bias due to confounding | Bias due to selection of participants | Bias due to exposure assessment | Bias due to misclassification during follow-up | Bias due to missing data | Bias due to measurement of the outcome | Bias due to selective reporting of the results | Overall judgement |
|-------------------------------|-------------------------|---------------------------------------|---------------------------------|------------------------------------------------|--------------------------|----------------------------------------|------------------------------------------------|-------------------|
| Chuang, 2012<br>Europe        | Moderate                | Low                                   | Moderate                        | Low                                            | Low                      | Low                                    | Low                                            | Moderate          |
| Gopinath, 2016<br>Australia   | Serious                 | Low                                   | Moderate                        | Low                                            | Low                      | Low                                    | Low                                            | Serious           |
| Huang, 2015<br>USA            | Moderate                | Low                                   | Moderate                        | Low                                            | Low                      | Low                                    | Low                                            | Moderate          |
| Jacobs, 2000<br>US            | Moderate                | Low                                   | Moderate                        | Low                                            | Low                      | Low                                    | Low                                            | Moderate          |
| Lubin, 2003<br>Israel         | Serious                 | Low                                   | Moderate                        | Low                                            | Low                      | Low                                    | Low                                            | Serious           |
| Mann, 1997<br>UK              | Serious                 | Serious                               | Moderate                        | Low                                            | Low                      | Low                                    | Low                                            | Serious           |
| Nilsson, 2012<br>Sweden       | Moderate                | Low                                   | Moderate                        | Low                                            | Low                      | Low                                    | Low                                            | Moderate          |
| Park, 2011<br>US              | Moderate                | Low                                   | Moderate                        | Low                                            | Low                      | Low                                    | Low                                            | Moderate          |
| Streppel, 2008<br>Netherlands | Serious                 | Low                                   | Low                             | Low                                            | Low                      | Low                                    | Low                                            | Serious           |
| Threapleton, 2013<br>UK       | Serious                 | Low                                   | Moderate                        | Low                                            | Low                      | Low                                    | Low                                            | Serious           |
| Todd, 1999<br>UK              | Serious                 | Low                                   | Moderate                        | Low                                            | Low                      | Low                                    | Low                                            | Serious           |
| Xu, 2014<br>Sweden            | Serious                 | Low                                   | Low                             | Low                                            | Low                      | Low                                    | Low                                            | Serious           |
| Xu, 2022<br>US                | Serious                 | Low                                   | Serious                         | Low                                            | Low                      | Low                                    | Low                                            | Serious           |
| Kwon, 2022<br>Korea           | Moderate                | Low                                   | Moderate                        | Low                                            | Low                      | Low                                    | Low                                            | Moderate          |
| You, 2022<br>Malaysia         | Serious                 | Low                                   | Serious                         | Low                                            | Low                      | Low                                    | Low                                            | Serious           |

**Supplemental Table 4.** Subgroup analyses of dietary fiber and the risk of all-cause mortality (highest versus lowest category meta-analysis).

|                                                                                   | <b>n</b> | <b>HR (95%CI)</b> | <b>I<sup>2</sup>, P<sub>heterogeneity</sub></b> | <b>P<sub>interaction</sub></b> |
|-----------------------------------------------------------------------------------|----------|-------------------|-------------------------------------------------|--------------------------------|
| <b>All studies</b>                                                                | 21       | 0.83 (0.78, 0.88) | 83%, <0.001                                     | -                              |
| <b>Sex</b>                                                                        |          |                   |                                                 | <0.001                         |
| Men                                                                               | 3        | 0.95 (0.86, 1.05) | 19%, 0.29                                       |                                |
| Both                                                                              | 17       | 0.79 (0.75, 0.84) | 81%, <0.001                                     |                                |
| Women                                                                             | 1        | 0.99 (0.89, 1.09) | -                                               |                                |
| <b>Geographical region</b>                                                        |          |                   |                                                 | 0.32                           |
| US                                                                                | 3        | 0.79 (0.70, 0.88) | 86%, 0.001                                      |                                |
| Europe                                                                            | 13       | 0.81 (0.72, 0.90) | 84%, <0.001                                     |                                |
| Asia                                                                              | 5        | 0.86 (0.79, 0.93) | 72%, 0.007                                      |                                |
| <b>Number of cases</b>                                                            |          |                   |                                                 | 0.52                           |
| <1000                                                                             | 11       | 0.83 (0.75, 0.92) | 63%, 0.002                                      |                                |
| >1000                                                                             | 10       | 0.81 (0.76, 0.87) | 86%, <0.001                                     |                                |
| <b>Follow-up duration</b>                                                         |          |                   |                                                 | 0.07                           |
| <10 years                                                                         | 5        | 0.79 (0.69, 0.90) | 82%, <0.001                                     |                                |
| >10 years                                                                         | 16       | 0.83 (0.78, 0.89) | 84%, <0.001                                     |                                |
| <b>Dietary assessment method</b>                                                  |          |                   |                                                 | 0.95                           |
| FFQ                                                                               | 14       | 0.82 (0.77, 0.87) | 75%, <0.001                                     |                                |
| Other                                                                             | 7        | 0.84 (0.74, 0.95) | 90%, <0.001                                     |                                |
| <b>Adjustments</b>                                                                |          |                   |                                                 | 0.10                           |
| <b>Smoking status</b>                                                             |          |                   |                                                 | 0.10                           |
| Yes                                                                               | 19       | 0.82 (0.77, 0.87) | 81%, <0.001                                     |                                |
| No                                                                                | 2        | 0.79 (0.52, 1.06) | 84%, 0.01                                       |                                |
| <b>Physical activity</b>                                                          |          |                   |                                                 | 0.77                           |
| Yes                                                                               | 14       | 0.82 (0.77, 0.87) | 70%, <0.001                                     |                                |
| No                                                                                | 7        | 0.85 (0.73, 0.96) | 92%, <0.001                                     |                                |
| <b>Energy intake</b>                                                              |          |                   |                                                 | 0.46                           |
| Yes                                                                               | 17       | 0.83 (0.78, 0.89) | 79%, <0.001                                     |                                |
| No                                                                                | 4        | 0.80 (0.67, 0.93) | 92%, <0.001                                     |                                |
| <b>Body mass index</b>                                                            |          |                   |                                                 | 0.34                           |
| Yes                                                                               | 19       | 0.82 (0.77, 0.87) | 82%, <0.001                                     |                                |
| No                                                                                | 2        | 0.91 (0.86, 0.96) | 0%, 0.90                                        |                                |
| <b>Alcohol drinking</b>                                                           |          |                   |                                                 | 0.47                           |
| Yes                                                                               | 15       | 0.81 (0.76, 0.86) | 84%, <0.001                                     |                                |
| No                                                                                | 6        | 0.89 (0.82, 0.96) | 28%, 0.23                                       |                                |
| <b>Smoking, Alcohol, body mass index,<br/>physical activity and energy intake</b> |          |                   |                                                 | 0.60                           |
| Yes                                                                               | 9        | 0.83 (0.77, 0.90) | 74%, <0.001                                     |                                |
| No                                                                                | 12       | 0.82 (0.74, 0.89) | 87%, <0.001                                     |                                |

**Abbreviations:** FFQ, food frequency questionnaire.

**Supplemental Table 5.** Subgroup analyses of total dietary fiber and the risk of cardiovascular mortality (highest versus lowest category meta-analysis).

|                                                                           | <b>n</b> | <b>HR (95%CI)</b> | <b>I<sup>2</sup>, P<sub>heterogeneity</sub></b> | <b>P<sub>interaction</sub></b> |
|---------------------------------------------------------------------------|----------|-------------------|-------------------------------------------------|--------------------------------|
| <b>All studies</b>                                                        | 14       | 0.79 (0.74, 0.85) | 42%, 0.03                                       | -                              |
| <b>Sex</b>                                                                |          |                   |                                                 | 0.31                           |
| Men                                                                       | 2        | 1.05 (0.83, 1.27) | 0%, 0.67                                        |                                |
| Women                                                                     | 2        | 0.82 (0.57, 1.08) | 0%, 0.69                                        |                                |
| Both                                                                      | 10       | 0.75 (0.71, 0.80) | 38%, 0.10                                       |                                |
| <b>Geographical region</b>                                                |          |                   |                                                 | 0.42                           |
| US                                                                        | 3        | 0.77 (0.68, 0.85) | 56%, 0.10                                       |                                |
| Europe                                                                    | 6        | 0.83 (0.69, 0.98) | 53%, 0.06                                       |                                |
| Asia                                                                      | 5        | 0.75 (0.67, 0.82) | 21%, 0.28                                       |                                |
| <b>Number of cases</b>                                                    |          |                   |                                                 | 0.90                           |
| <1000                                                                     | 8        | 0.79 (0.65, 0.93) | 57%, 0.02                                       |                                |
| >1000                                                                     | 6        | 0.76 (0.72, 0.80) | 12%, 0.34                                       |                                |
| <b>Follow-up duration</b>                                                 |          |                   |                                                 | 0.16                           |
| <10 years                                                                 | 2        | 0.65 (0.41, 0.89) | 55%, 0.14                                       |                                |
| >10 years                                                                 | 12       | 0.79 (0.73, 0.85) | 39%, 0.08                                       |                                |
| <b>Assessment method</b>                                                  |          |                   |                                                 | 0.50                           |
| FFQ                                                                       | 11       | 0.76 (0.70, 0.82) | 34%, 0.13                                       |                                |
| Other                                                                     | 3        | 0.87 (0.67, 1.06) | 69%, 0.04                                       |                                |
| <b>Adjustments</b>                                                        |          |                   |                                                 |                                |
| Smoking status                                                            |          |                   |                                                 | -                              |
| Yes                                                                       | 14       | 0.77 (0.72, 0.83) | 41%, 0.05                                       |                                |
| No                                                                        | -        | -                 | -                                               |                                |
| Physical activity                                                         |          |                   |                                                 | 0.46                           |
| Yes                                                                       | 10       | 0.79 (0.72, 0.86) | 57%, 0.01                                       |                                |
| No                                                                        | 4        | 0.73 (0.66, 0.81) | 0%, 0.86                                        |                                |
| Energy intake                                                             |          |                   |                                                 | 0.24                           |
| Yes                                                                       | 10       | 0.76 (0.69, 0.83) | 47%, 0.05                                       |                                |
| No                                                                        | 4        | 0.80 (0.72, 0.87) | 22%, 0.28                                       |                                |
| Body mass index                                                           |          |                   |                                                 | 0.51                           |
| Yes                                                                       | 13       | 0.77 (0.72, 0.83) | 45%, 0.04                                       |                                |
| No                                                                        | 1        | 0.86 (0.56, 1.16) | -                                               |                                |
| Alcohol drinking                                                          |          |                   |                                                 | 0.11                           |
| Yes                                                                       | 11       | 0.76 (0.71, 0.81) | 40%, 0.08                                       |                                |
| No                                                                        | 3        | 0.92 (0.76, 1.08) | 0%, 0.47                                        |                                |
| Smoking, Alcohol, body mass index,<br>physical activity and energy intake |          |                   |                                                 | 0.11                           |
| Yes                                                                       | 5        | 0.78 (0.63, 0.83) | 60%, 0.04                                       |                                |
| No                                                                        | 9        | 0.80 (0.74, 0.85) | 18%, 0.29                                       |                                |

**Abbreviations:** FFQ, food frequency questionnaire.

Supplementary Information

**Supplemental Table 6.** GRADE evidence table for the association of dietary fibers and the risk of total and cause-specific mortality.

**Author(s):** Amin Mirrafiei, Ahmad Jayedi, Sakineh Shab-Bidar

**Question:** Is there an association between fiber intake and mortality risk?

**Setting:** General population

| Certainty assessment |              |              |               |              |             |                      | No of patients |            | Effect            |                   | Certainty | Importance |
|----------------------|--------------|--------------|---------------|--------------|-------------|----------------------|----------------|------------|-------------------|-------------------|-----------|------------|
| No of studies        | Study design | Risk of bias | Inconsistency | Indirectness | Imprecision | Other considerations | Populations    | Events (%) | Relative (95% CI) | Absolute (95% CI) |           |            |

**Total Fiber and All-cause Mortality**

|    |                       |                      |                          |             |                      |                        |           |                |                                  |                                                         |                  |          |
|----|-----------------------|----------------------|--------------------------|-------------|----------------------|------------------------|-----------|----------------|----------------------------------|---------------------------------------------------------|------------------|----------|
| 21 | observational studies | serious <sup>a</sup> | not serious <sup>b</sup> | not serious | serious <sup>c</sup> | dose response gradient | 1,451,903 | 103,165 (7.1%) | <b>HR 0.83</b><br>(0.78 to 0.88) | <b>15 fewer per 1,000</b><br>(from 15 fewer to 8 fewer) | ⊕⊕⊕○<br>MODERATE | CRITICAL |
|----|-----------------------|----------------------|--------------------------|-------------|----------------------|------------------------|-----------|----------------|----------------------------------|---------------------------------------------------------|------------------|----------|

**Total Fiber and Cardiovascular Mortality**

|    |                       |                      |             |             |                      |                        |           |               |                                  |                                                       |                  |          |
|----|-----------------------|----------------------|-------------|-------------|----------------------|------------------------|-----------|---------------|----------------------------------|-------------------------------------------------------|------------------|----------|
| 14 | observational studies | serious <sup>d</sup> | not serious | not serious | serious <sup>e</sup> | dose response gradient | 1,293,630 | 28,324 (2.2%) | <b>HR 0.79</b><br>(0.74 to 0.85) | <b>6 fewer per 1,000</b><br>(from 8 fewer to 5 fewer) | ⊕⊕⊕○<br>MODERATE | CRITICAL |
|----|-----------------------|----------------------|-------------|-------------|----------------------|------------------------|-----------|---------------|----------------------------------|-------------------------------------------------------|------------------|----------|

**Total Fiber and Cancer Mortality**

|   |                       |                      |             |             |                      |                        |           |               |                                  |                                                       |                  |          |
|---|-----------------------|----------------------|-------------|-------------|----------------------|------------------------|-----------|---------------|----------------------------------|-------------------------------------------------------|------------------|----------|
| 7 | observational studies | serious <sup>f</sup> | not serious | not serious | Serious <sup>g</sup> | dose response gradient | 1,044,471 | 36,561 (3.5%) | <b>HR 0.85</b><br>(0.80 to 0.90) | <b>5 fewer per 1,000</b><br>(from 7 fewer to 3 fewer) | ⊕⊕⊕○<br>MODERATE | CRITICAL |
|---|-----------------------|----------------------|-------------|-------------|----------------------|------------------------|-----------|---------------|----------------------------------|-------------------------------------------------------|------------------|----------|

## Supplementary Information

| Certainty assessment |              |              |               |              |             |                      | № of patients |            | Effect            |                   | Certainty | Importance |
|----------------------|--------------|--------------|---------------|--------------|-------------|----------------------|---------------|------------|-------------------|-------------------|-----------|------------|
| № of studies         | Study design | Risk of bias | Inconsistency | Indirectness | Imprecision | Other considerations | Populations   | Events (%) | Relative (95% CI) | Absolute (95% CI) |           |            |

### Cereal Fiber and All-cause Mortality

|   |                       |                      |                      |             |                      |                        |           |               |                                  |                                                         |             |          |
|---|-----------------------|----------------------|----------------------|-------------|----------------------|------------------------|-----------|---------------|----------------------------------|---------------------------------------------------------|-------------|----------|
| 9 | observational studies | serious <sup>h</sup> | serious <sup>i</sup> | not serious | serious <sup>j</sup> | dose response gradient | 1,103,701 | 97,768 (8.9%) | <b>HR 0.86</b><br>(0.80 to 0.92) | <b>10 fewer per 1,000</b><br>(from 14 fewer to 6 fewer) | ⊕⊕○○<br>LOW | CRITICAL |
|---|-----------------------|----------------------|----------------------|-------------|----------------------|------------------------|-----------|---------------|----------------------------------|---------------------------------------------------------|-------------|----------|

### Cereal Fiber and Cardiovascular Mortality

|   |                       |                      |                      |             |                      |                        |           |               |                                  |                                                       |             |          |
|---|-----------------------|----------------------|----------------------|-------------|----------------------|------------------------|-----------|---------------|----------------------------------|-------------------------------------------------------|-------------|----------|
| 8 | observational studies | serious <sup>k</sup> | serious <sup>l</sup> | not serious | serious <sup>m</sup> | dose response gradient | 1,066,140 | 24,838 (2.3%) | <b>HR 0.87</b><br>(0.81 to 0.95) | <b>4 fewer per 1,000</b><br>(from 6 fewer to 2 fewer) | ⊕⊕○○<br>LOW | CRITICAL |
|---|-----------------------|----------------------|----------------------|-------------|----------------------|------------------------|-----------|---------------|----------------------------------|-------------------------------------------------------|-------------|----------|

### Cereal Fiber and Cancer Mortality

|   |                       |                      |                      |             |                      |                        |         |               |                                  |                                                       |             |          |
|---|-----------------------|----------------------|----------------------|-------------|----------------------|------------------------|---------|---------------|----------------------------------|-------------------------------------------------------|-------------|----------|
| 5 | observational studies | serious <sup>n</sup> | serious <sup>o</sup> | not serious | serious <sup>p</sup> | dose response gradient | 973,639 | 38,625 (4.0%) | <b>HR 0.89</b><br>(0.83 to 0.95) | <b>4 fewer per 1,000</b><br>(from 6 fewer to 2 fewer) | ⊕⊕○○<br>LOW | CRITICAL |
|---|-----------------------|----------------------|----------------------|-------------|----------------------|------------------------|---------|---------------|----------------------------------|-------------------------------------------------------|-------------|----------|

## Supplementary Information

| Certainty assessment |              |              |               |              |             |                      | № of patients |            | Effect            |                   | Certainty | Importance |
|----------------------|--------------|--------------|---------------|--------------|-------------|----------------------|---------------|------------|-------------------|-------------------|-----------|------------|
| № of studies         | Study design | Risk of bias | Inconsistency | Indirectness | Imprecision | Other considerations | Populations   | Events (%) | Relative (95% CI) | Absolute (95% CI) |           |            |

### Fruit Fiber and All-cause Mortality

|   |                       |                      |                      |             |                      |                        |           |               |                                  |                                                      |             |          |
|---|-----------------------|----------------------|----------------------|-------------|----------------------|------------------------|-----------|---------------|----------------------------------|------------------------------------------------------|-------------|----------|
| 7 | observational studies | serious <sup>q</sup> | serious <sup>r</sup> | not serious | serious <sup>s</sup> | dose response gradient | 1,063,825 | 77,324 (7.3%) | <b>HR 0.97</b><br>(0.88 to 1.04) | <b>2 fewer per 1,000</b><br>(from 8 fewer to 2 more) | ⊕⊕○○<br>LOW | CRITICAL |
|---|-----------------------|----------------------|----------------------|-------------|----------------------|------------------------|-----------|---------------|----------------------------------|------------------------------------------------------|-------------|----------|

### Fruit Fiber and Cardiovascular Mortality

|   |                       |                      |                      |             |                      |                        |           |               |                                  |                                                        |             |          |
|---|-----------------------|----------------------|----------------------|-------------|----------------------|------------------------|-----------|---------------|----------------------------------|--------------------------------------------------------|-------------|----------|
| 6 | observational studies | serious <sup>t</sup> | serious <sup>u</sup> | not serious | serious <sup>v</sup> | dose response gradient | 1,026,264 | 19,767 (1.9%) | <b>HR 0.80</b><br>(0.68 to 0.95) | <b>6 fewer per 1,000</b><br>(from 10 fewer to 2 fewer) | ⊕⊕○○<br>LOW | CRITICAL |
|---|-----------------------|----------------------|----------------------|-------------|----------------------|------------------------|-----------|---------------|----------------------------------|--------------------------------------------------------|-------------|----------|

### Fruit Fiber and Cancer Mortality

|   |                       |                      |             |             |                      |      |         |               |                                  |                                                      |             |          |
|---|-----------------------|----------------------|-------------|-------------|----------------------|------|---------|---------------|----------------------------------|------------------------------------------------------|-------------|----------|
| 3 | observational studies | serious <sup>w</sup> | not serious | not serious | serious <sup>x</sup> | none | 933,763 | 29,865 (3.2%) | <b>HR 0.99</b><br>(0.96 to 1.02) | <b>0 fewer per 1,000</b><br>(from 1 fewer to 1 more) | ⊕⊕○○<br>LOW | CRITICAL |
|---|-----------------------|----------------------|-------------|-------------|----------------------|------|---------|---------------|----------------------------------|------------------------------------------------------|-------------|----------|

## Supplementary Information

| Certainty assessment |              |              |               |              |             |                      | № of patients |            | Effect            |                   | Certainty | Importance |
|----------------------|--------------|--------------|---------------|--------------|-------------|----------------------|---------------|------------|-------------------|-------------------|-----------|------------|
| № of studies         | Study design | Risk of bias | Inconsistency | Indirectness | Imprecision | Other considerations | Populations   | Events (%) | Relative (95% CI) | Absolute (95% CI) |           |            |

### Vegetable Fiber and All-cause Mortality

|   |                       |                      |                      |             |                      |                        |           |               |                                  |                                                        |             |          |
|---|-----------------------|----------------------|----------------------|-------------|----------------------|------------------------|-----------|---------------|----------------------------------|--------------------------------------------------------|-------------|----------|
| 7 | observational studies | serious <sup>y</sup> | serious <sup>z</sup> | not serious | serious <sup>x</sup> | dose response gradient | 1,063,825 | 77,324 (7.3%) | <b>HR 0.91</b><br>(0.85 to 0.98) | <b>6 fewer per 1,000</b><br>(from 11 fewer to 1 fewer) | ⊕⊕○○<br>LOW | CRITICAL |
|---|-----------------------|----------------------|----------------------|-------------|----------------------|------------------------|-----------|---------------|----------------------------------|--------------------------------------------------------|-------------|----------|

### Vegetable Fiber and Cardiovascular Mortality

|   |                       |                       |             |             |                      |                        |           |               |                                  |                                                       |                  |          |
|---|-----------------------|-----------------------|-------------|-------------|----------------------|------------------------|-----------|---------------|----------------------------------|-------------------------------------------------------|------------------|----------|
| 6 | observational studies | serious <sup>aa</sup> | not serious | not serious | serious <sup>p</sup> | dose response gradient | 1,026,264 | 19,767 (1.9%) | <b>HR 0.93</b><br>(0.89 to 0.97) | <b>2 fewer per 1,000</b><br>(from 3 fewer to 1 fewer) | ⊕⊕⊕○<br>MODERATE | CRITICAL |
|---|-----------------------|-----------------------|-------------|-------------|----------------------|------------------------|-----------|---------------|----------------------------------|-------------------------------------------------------|------------------|----------|

### Vegetable Fiber and Cancer Mortality

|   |                       |                       |             |             |                      |                        |         |               |                                  |                                                       |                  |          |
|---|-----------------------|-----------------------|-------------|-------------|----------------------|------------------------|---------|---------------|----------------------------------|-------------------------------------------------------|------------------|----------|
| 3 | observational studies | serious <sup>ab</sup> | not serious | not serious | serious <sup>p</sup> | dose response gradient | 933,763 | 29,865 (3.2%) | <b>HR 0.95</b><br>(0.92 to 0.98) | <b>2 fewer per 1,000</b><br>(from 3 fewer to 1 fewer) | ⊕⊕⊕○<br>MODERATE | CRITICAL |
|---|-----------------------|-----------------------|-------------|-------------|----------------------|------------------------|---------|---------------|----------------------------------|-------------------------------------------------------|------------------|----------|

### Legumes Fiber and All-cause Mortality

|   |                       |                       |             |             |                      |      |         |               |                                  |                                                       |             |          |
|---|-----------------------|-----------------------|-------------|-------------|----------------------|------|---------|---------------|----------------------------------|-------------------------------------------------------|-------------|----------|
| 5 | observational studies | serious <sup>ac</sup> | not serious | not serious | serious <sup>p</sup> | none | 609,499 | 53,162 (8.7%) | <b>HR 0.93</b><br>(0.89 to 0.96) | <b>5 fewer per 1,000</b><br>(from 8 fewer to 3 fewer) | ⊕⊕○○<br>LOW | CRITICAL |
|---|-----------------------|-----------------------|-------------|-------------|----------------------|------|---------|---------------|----------------------------------|-------------------------------------------------------|-------------|----------|



## Supplementary Information

| Certainty assessment |              |              |               |              |             |                      | No of patients |            | Effect            |                   | Certainty | Importance |
|----------------------|--------------|--------------|---------------|--------------|-------------|----------------------|----------------|------------|-------------------|-------------------|-----------|------------|
| No of studies        | Study design | Risk of bias | Inconsistency | Indirectness | Imprecision | Other considerations | Populations    | Events (%) | Relative (95% CI) | Absolute (95% CI) |           |            |

### Legumes Fiber and Cardiovascular Mortality

|   |                       |                       |             |             |                      |                        |         |               |                                  |                                                       |                  |          |
|---|-----------------------|-----------------------|-------------|-------------|----------------------|------------------------|---------|---------------|----------------------------------|-------------------------------------------------------|------------------|----------|
| 3 | observational studies | serious <sup>ad</sup> | not serious | not serious | serious <sup>p</sup> | dose response gradient | 512,802 | 12,823 (2.5%) | <b>HR 0.88</b><br>(0.84 to 0.94) | <b>4 fewer per 1,000</b><br>(from 5 fewer to 5 fewer) | ⊕⊕⊕○<br>MODERATE | CRITICAL |
|---|-----------------------|-----------------------|-------------|-------------|----------------------|------------------------|---------|---------------|----------------------------------|-------------------------------------------------------|------------------|----------|

### Legumes Fiber and Cancer Mortality

|   |                       |                       |             |             |                      |      |         |               |                                  |                                                      |             |          |
|---|-----------------------|-----------------------|-------------|-------------|----------------------|------|---------|---------------|----------------------------------|------------------------------------------------------|-------------|----------|
| 2 | observational studies | serious <sup>ae</sup> | not serious | not serious | serious <sup>x</sup> | none | 481,046 | 20,251 (4.2%) | <b>HR 1.00</b><br>(0.96 to 1.05) | <b>0 fewer per 1,000</b><br>(from 2 fewer to 2 more) | ⊕⊕○○<br>LOW | CRITICAL |
|---|-----------------------|-----------------------|-------------|-------------|----------------------|------|---------|---------------|----------------------------------|------------------------------------------------------|-------------|----------|

### Soluble Fiber and All-cause Mortality

|   |                       |                       |                       |             |                      |                        |         |                |                                  |                                                         |             |          |
|---|-----------------------|-----------------------|-----------------------|-------------|----------------------|------------------------|---------|----------------|----------------------------------|---------------------------------------------------------|-------------|----------|
| 6 | observational studies | serious <sup>af</sup> | serious <sup>ag</sup> | not serious | serious <sup>x</sup> | dose response gradient | 332,162 | 43,690 (13.2%) | <b>HR 0.85</b><br>(0.75 to 0.96) | <b>11 fewer per 1,000</b><br>(from 18 fewer to 3 fewer) | ⊕⊕○○<br>LOW | CRITICAL |
|---|-----------------------|-----------------------|-----------------------|-------------|----------------------|------------------------|---------|----------------|----------------------------------|---------------------------------------------------------|-------------|----------|

## Supplementary Information

| Certainty assessment |              |              |               |              |             |                      | № of patients |            | Effect            |                   | Certainty | Importance |
|----------------------|--------------|--------------|---------------|--------------|-------------|----------------------|---------------|------------|-------------------|-------------------|-----------|------------|
| № of studies         | Study design | Risk of bias | Inconsistency | Indirectness | Imprecision | Other considerations | Populations   | Events (%) | Relative (95% CI) | Absolute (95% CI) |           |            |

### Soluble Fiber and Cardiovascular Mortality

|   |                       |                       |             |             |                      |                        |         |             |                                  |                                                       |                  |          |
|---|-----------------------|-----------------------|-------------|-------------|----------------------|------------------------|---------|-------------|----------------------------------|-------------------------------------------------------|------------------|----------|
| 2 | observational studies | serious <sup>af</sup> | not serious | not serious | serious <sup>p</sup> | dose response gradient | 176,408 | 7180 (4.1%) | <b>HR 0.79</b><br>(0.71 to 0.87) | <b>6 fewer per 1,000</b><br>(from 9 fewer to 4 fewer) | ⊕⊕⊕○<br>MODERATE | CRITICAL |
|---|-----------------------|-----------------------|-------------|-------------|----------------------|------------------------|---------|-------------|----------------------------------|-------------------------------------------------------|------------------|----------|

### Soluble Fiber and Cancer Mortality

|   |                       |                       |             |             |                            |                        |         |             |                                  |                                                       |             |          |
|---|-----------------------|-----------------------|-------------|-------------|----------------------------|------------------------|---------|-------------|----------------------------------|-------------------------------------------------------|-------------|----------|
| 1 | observational studies | serious <sup>af</sup> | not serious | not serious | very serious <sup>ah</sup> | dose response gradient | 102,382 | 6416 (6.3%) | <b>HR 0.97</b><br>(0.63 to 1.51) | <b>1 more per 1,000</b><br>(from 13 fewer to 17 more) | ⊕⊕○○<br>LOW | CRITICAL |
|---|-----------------------|-----------------------|-------------|-------------|----------------------------|------------------------|---------|-------------|----------------------------------|-------------------------------------------------------|-------------|----------|

### Insoluble Fiber and All-cause Mortality

|   |                       |                       |                       |             |             |                        |         |                |                                  |                                                          |                  |          |
|---|-----------------------|-----------------------|-----------------------|-------------|-------------|------------------------|---------|----------------|----------------------------------|----------------------------------------------------------|------------------|----------|
| 4 | observational studies | serious <sup>aj</sup> | serious <sup>ak</sup> | not serious | not serious | dose response gradient | 322,386 | 41,058 (12.7%) | <b>HR 0.77</b><br>(0.71 to 0.84) | <b>16 fewer per 1,000</b><br>(from 21 fewer to 11 fewer) | ⊕⊕⊕○<br>MODERATE | CRITICAL |
|---|-----------------------|-----------------------|-----------------------|-------------|-------------|------------------------|---------|----------------|----------------------------------|----------------------------------------------------------|------------------|----------|

### Insoluble Fiber and Cardiovascular Mortality

|   |                       |                       |             |             |                      |                        |         |             |                                  |                                                        |                  |          |
|---|-----------------------|-----------------------|-------------|-------------|----------------------|------------------------|---------|-------------|----------------------------------|--------------------------------------------------------|------------------|----------|
| 3 | observational studies | serious <sup>af</sup> | not serious | not serious | serious <sup>x</sup> | dose response gradient | 176,408 | 7180 (4.1%) | <b>HR 0.74</b><br>(0.67 to 0.81) | <b>8 fewer per 1,000</b><br>(from 10 fewer to 6 fewer) | ⊕⊕⊕○<br>MODERATE | CRITICAL |
|---|-----------------------|-----------------------|-------------|-------------|----------------------|------------------------|---------|-------------|----------------------------------|--------------------------------------------------------|------------------|----------|

## Supplementary Information

| Certainty assessment |              |              |               |              |             |                      | No of patients |            | Effect            |                   | Certainty | Importance |
|----------------------|--------------|--------------|---------------|--------------|-------------|----------------------|----------------|------------|-------------------|-------------------|-----------|------------|
| No of studies        | Study design | Risk of bias | Inconsistency | Indirectness | Imprecision | Other considerations | Populations    | Events (%) | Relative (95% CI) | Absolute (95% CI) |           |            |

### Insoluble Fiber and Cancer Mortality

|   |                       |                       |             |             |                      |                        |         |             |                                  |                                                       |                  |          |
|---|-----------------------|-----------------------|-------------|-------------|----------------------|------------------------|---------|-------------|----------------------------------|-------------------------------------------------------|------------------|----------|
| 2 | observational studies | serious <sup>af</sup> | not serious | not serious | serious <sup>p</sup> | dose response gradient | 102,382 | 6416 (6.3%) | <b>HR 0.81</b><br>(0.72 to 0.91) | <b>6 fewer per 1,000</b><br>(from 9 fewer to 3 fewer) | ⊕⊕⊕○<br>MODERATE | CRITICAL |
|---|-----------------------|-----------------------|-------------|-------------|----------------------|------------------------|---------|-------------|----------------------------------|-------------------------------------------------------|------------------|----------|

CI: Confidence interval; HR: Hazard Ratio.

#### Explanations:

- a. Downgraded since 8 studies with low weighting (41%) judged as serious risk of bias based on ROBINS-I was included in the meta-analysis and residual confounding cannot be ruled out.
- b. Serious inconsistency since  $I^2 = 83\%$ ,  $P_{het} < 0.001$ ; however, a subgroup analysis by adjustment for alcohol drinking partly explained the heterogeneity. Not downgraded.
- c. Serious imprecision since 95%CI overlapped MCID threshold ( $\pm 1\%$ ). Downgraded.
- d. Downgraded since 6 studies with moderate weighting (50.5%) judged as serious risk of bias based on ROBINS-I was included in the meta-analysis and residual confounding cannot be ruled out.
- e. Serious imprecision since point estimate was lower than MCID threshold. Downgraded.
- f. Downgraded since 2 studies with low weighting (21%) judged as serious risk of bias based on ROBINS-I was included in the meta-analysis and residual confounding cannot be ruled out.
- g. Serious imprecision since point estimate was lower than MCID threshold. Downgraded.
- h. Downgraded since 3 studies with low weighting (18.5%) judged as serious risk of bias based on ROBINS-I was included in the meta-analysis and residual confounding cannot be ruled out.
- i. Serious inconsistency since  $I^2 = 89\%$ . Downgraded.
- j. Serious imprecision since 95%CI overlapped MCID threshold ( $\pm 1\%$ ). Downgraded.

## Supplementary Information

- k. Downgraded since 3 studies with low weighting (29.6%) judged as serious risk of bias based on ROBINS-I was included in the meta-analysis and residual confounding cannot be ruled out.
- l. Serious inconsistency since  $I^2 = 72\%$ . Downgraded.
- m. Serious imprecision sine point estimate was lower than MCID threshold. Downgraded.
- n. Downgraded since 1 study with low weighting (9.3%) judged as serious risk of bias based on ROBINS-I was included in the meta-analysis and residual confounding cannot be ruled out.
- o. Serious inconsistency since  $I^2 = 80\%$ . Downgraded.
- p. Serious imprecision sine point estimate was lower than MCID threshold. Downgraded.
- q. Downgraded since 2 studies with low weighting (22.3%) judged as serious risk of bias based on ROBINS-I was included in the meta-analysis and residual confounding cannot be ruled out.
- r. Serious inconsistency since  $I^2 = 86\%$ . Downgraded.
- s. Serious imprecision sine 95%CI overlapped MCID threshold ( $\pm 1\%$ ). Downgraded.
- t. Downgraded since 2 studies with low weighting (35.6%) judged as serious risk of bias based on ROBINS-I was included in the meta-analysis and residual confounding cannot be ruled out.
- u. Serious inconsistency since  $I^2 = 90\%$ . Downgraded.
- v. Serious imprecision sine 95%CI overlapped MCID threshold ( $\pm 1\%$ ). Downgraded.
- w. Downgraded since 1 study with moderate weighting (45.3%) judged as serious risk of bias based on ROBINS-I was included in the meta-analysis and residual confounding cannot be ruled out.
- x. Serious imprecision sine 95%CI overlapped MCID threshold ( $\pm 1\%$ ). Downgraded.
- y. Downgraded since 2 studies with low weighting (27.0%) judged as serious risk of bias based on ROBINS-I was included in the meta-analysis and residual confounding cannot be ruled out.
- z. Serious inconsistency since  $I^2 = 82\%$ . Downgraded.
- aa. Downgraded since 2 studies with low weighting (33.9%) judged as serious risk of bias based on ROBINS-I was included in the meta-analysis and residual confounding cannot be ruled out.
- ab. Downgraded since 1 study with low weighting (38.9%) judged as serious risk of bias based on ROBINS-I was included in the meta-analysis and residual confounding cannot be ruled out.

## Supplementary Information

- ac. Downgraded since 1 study with low weighting (12%) judged as serious risk of bias based on ROBINS-I was included in the meta-analysis and residual confounding cannot be ruled out.
- ad. Downgraded since 1 study with low weighting (22%) judged as serious risk of bias based on ROBINS-I was included in the meta-analysis and residual confounding cannot be ruled out.
- ae. Residual confounding cannot be ruled out.
- af. Residual confounding cannot be ruled out.
- ag. Serious inconsistency since  $I^2 = 88\%$ . Downgraded.
- ah. Very serious imprecision since 95%CI overlapped the MCID threshold and surpassed important harm (+1%). Downgraded to two levels.
- aj. Downgraded since 1 study with low weighting (29%) judged as serious risk of bias based on ROBINS-I was included in the meta-analysis and residual confounding cannot be ruled out.
- ak. Serious inconsistency since  $I^2 = 67\%$ . Downgraded.



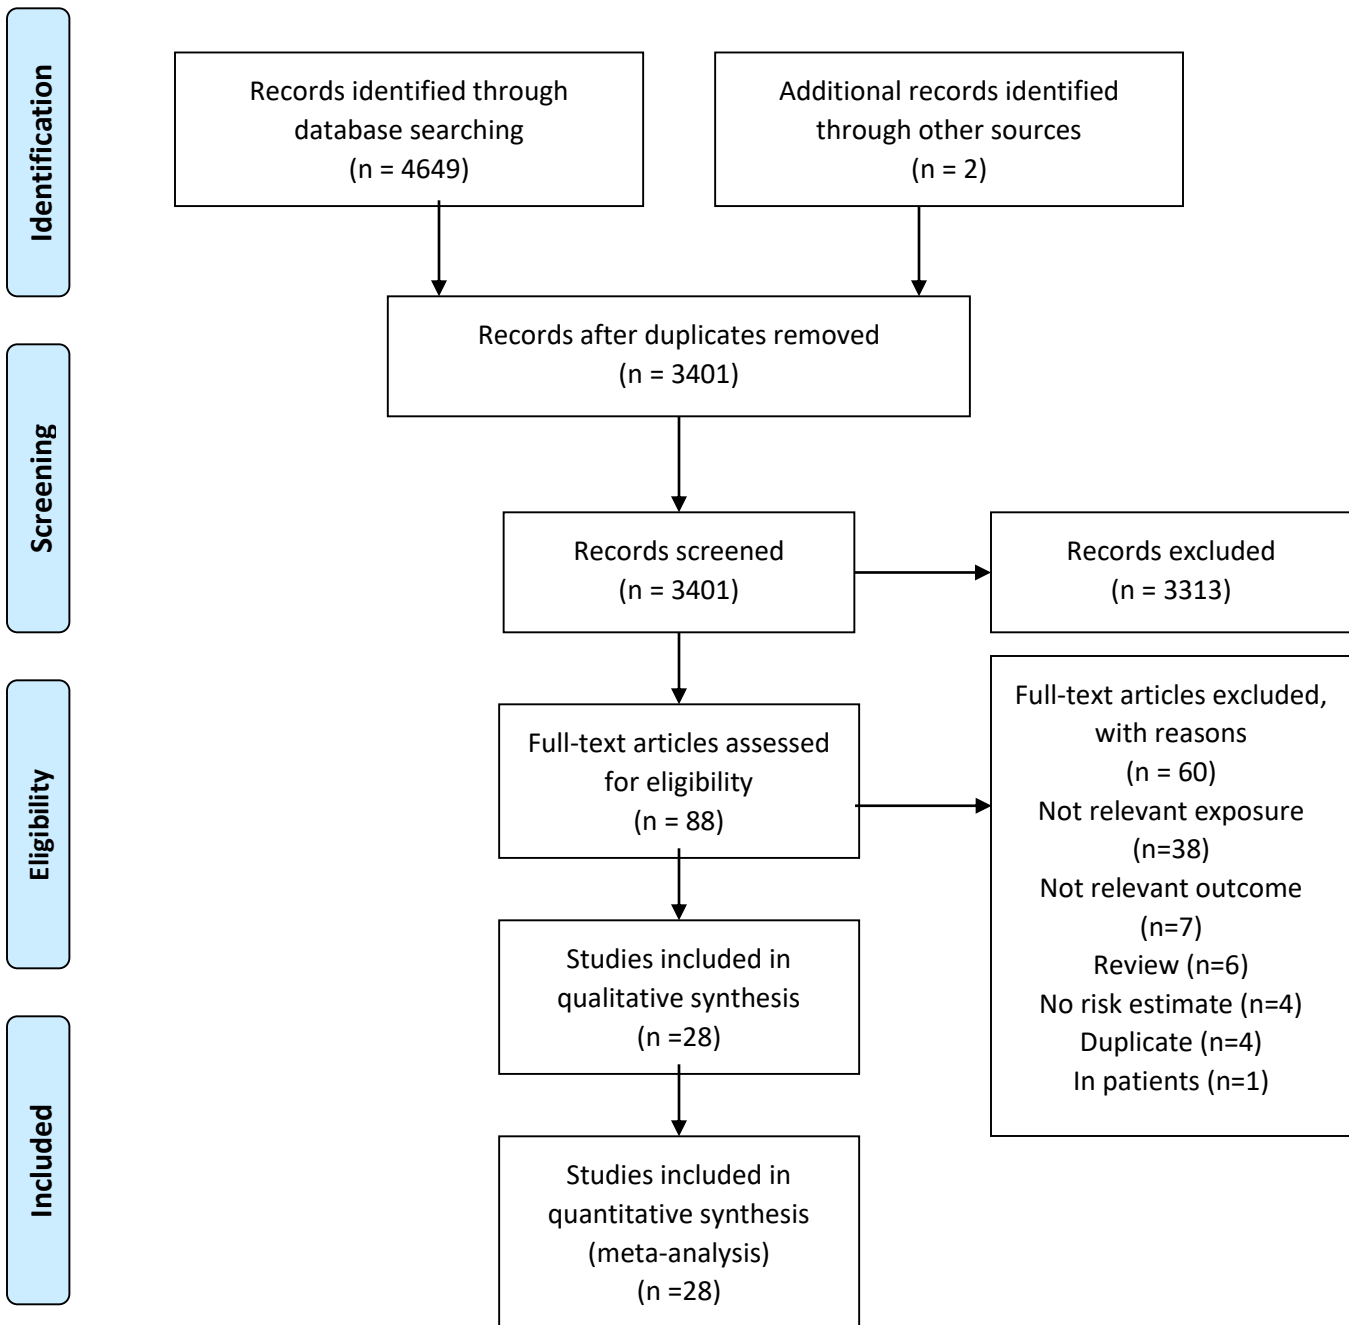

**Supplemental Figure 1.** Literature search and study selection process.

Supplementary Information

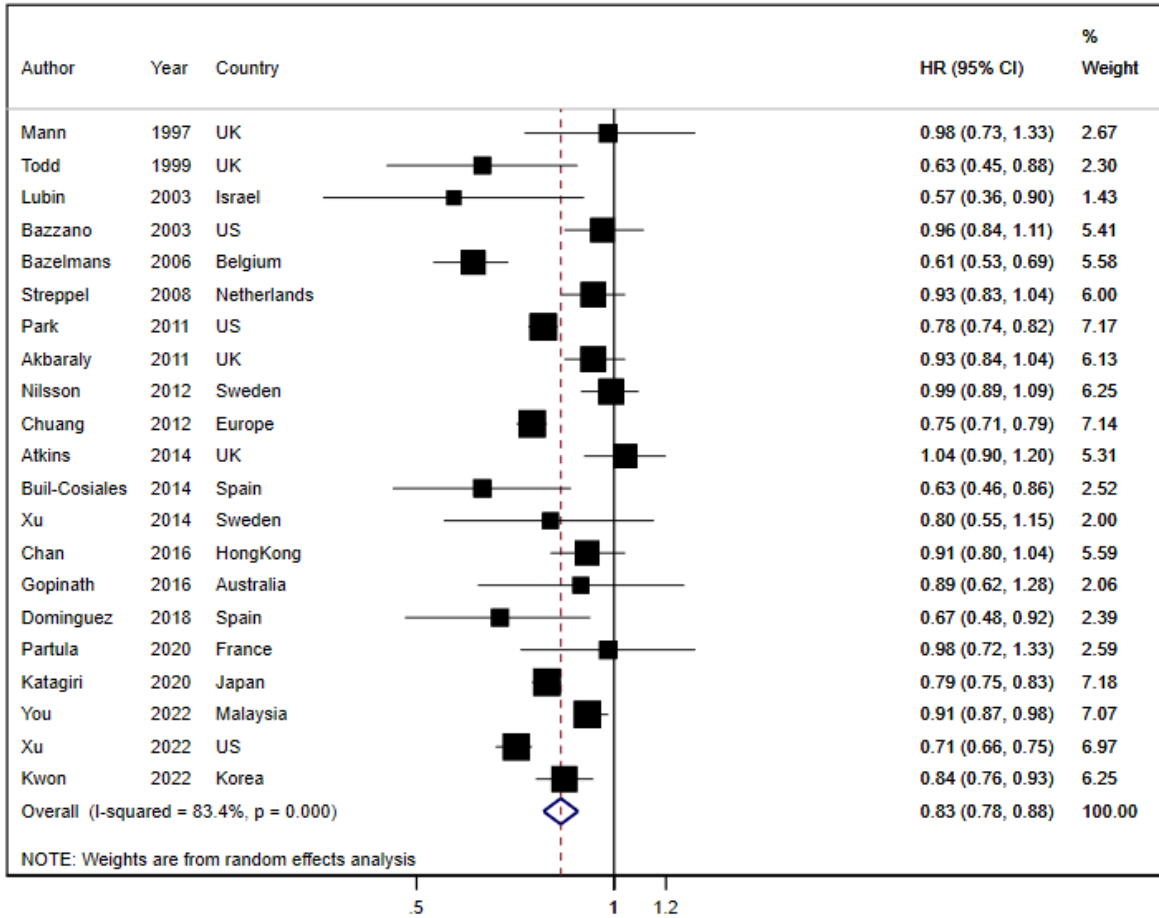

**Supplemental Figure 2.** Hazard ratio of all-cause mortality for the highest compared with the lowest category of total fiber intake. HR, hazard ratio.



Supplementary Information

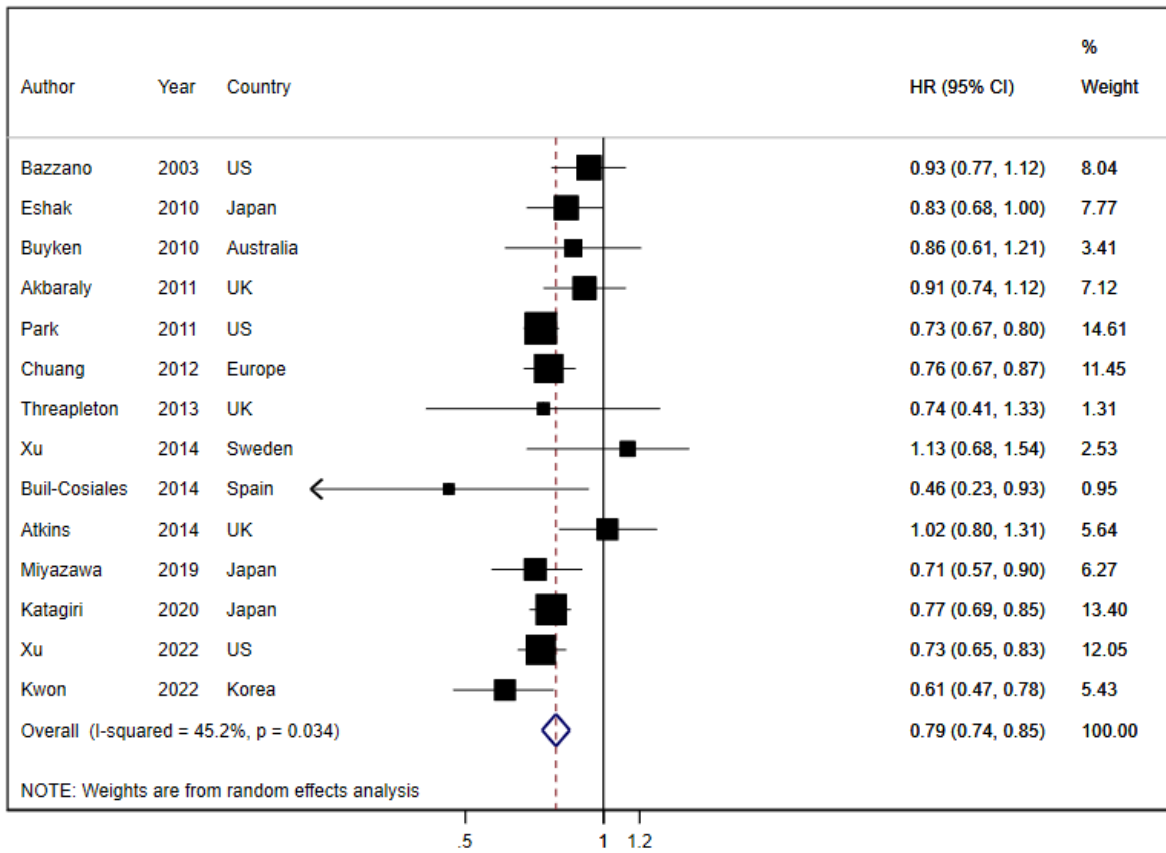

**Supplemental Figure 3.** Hazard ratio of cardiovascular mortality for the highest compared with the lowest category of dietary fiber intake. HR, hazard ratio.

Supplementary Information

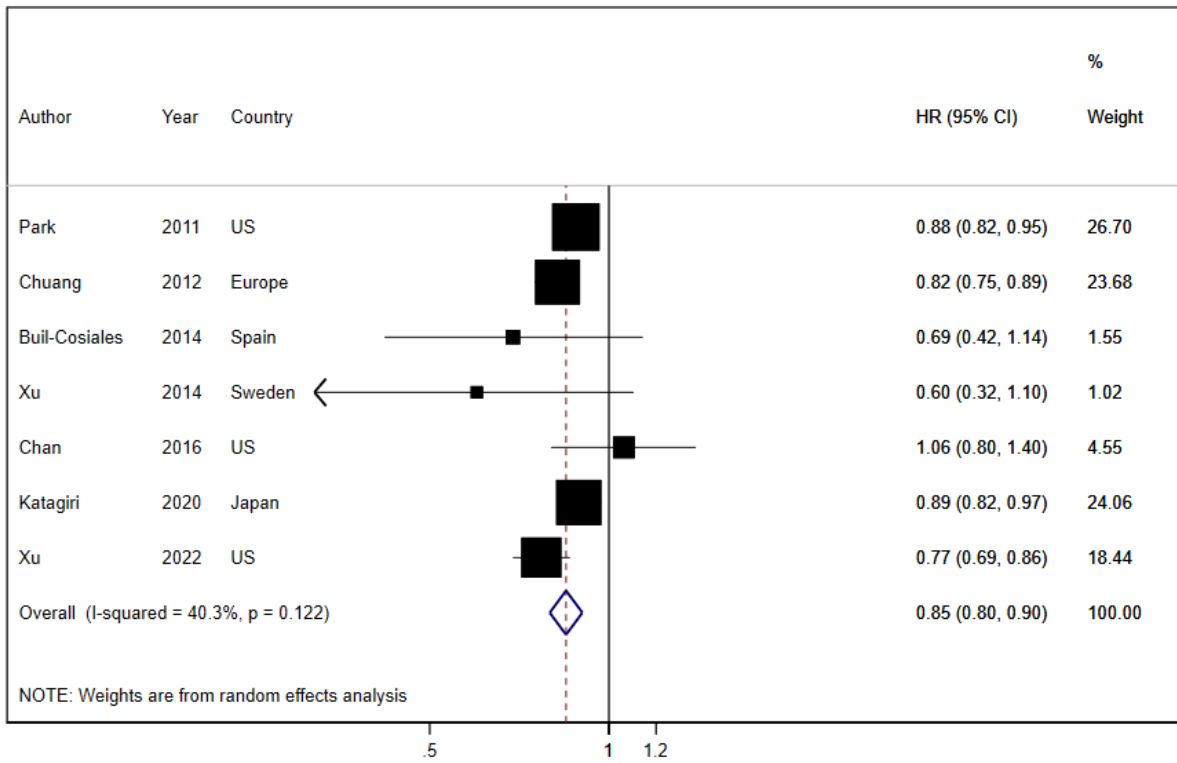

**Supplemental Figure 4.** Hazard ratio of cancer mortality for the highest compared with the lowest category of dietary fiber intake. HR, hazard ratio.

Supplementary Information

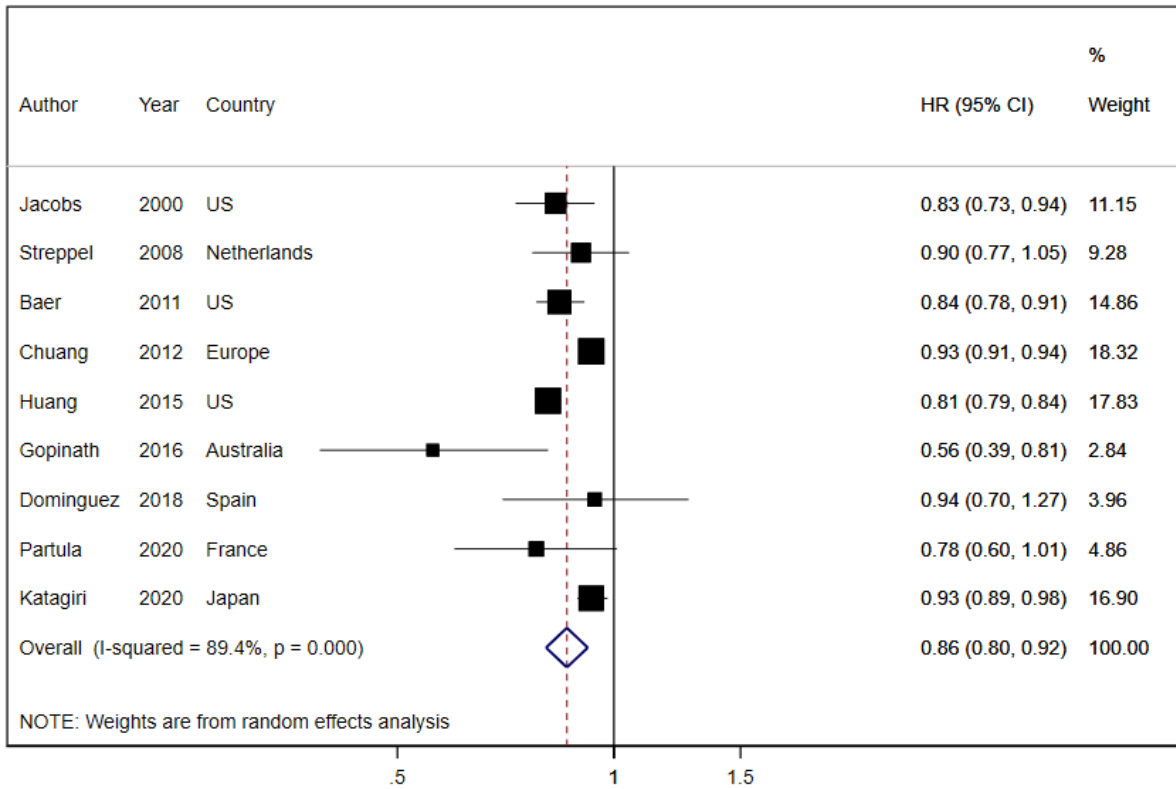

**Supplemental Figure 5.** Hazard ratio of all-cause mortality for the highest compared with the lowest category of cereal fiber intake. HR, hazard ratio.

Supplementary Information

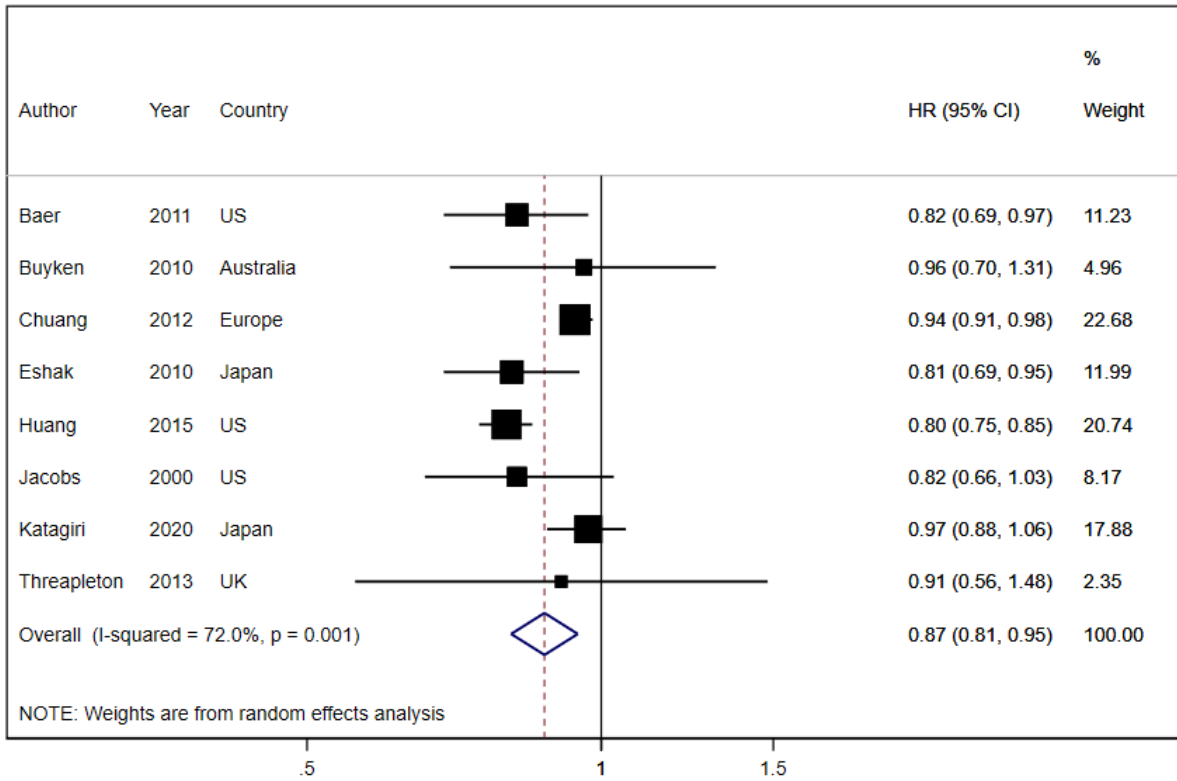

**Supplemental Figure 6.** Hazard ratio of cardiovascular mortality for the highest compared with the lowest category of cereal fiber intake. HR, hazard ratio.

Supplementary Information

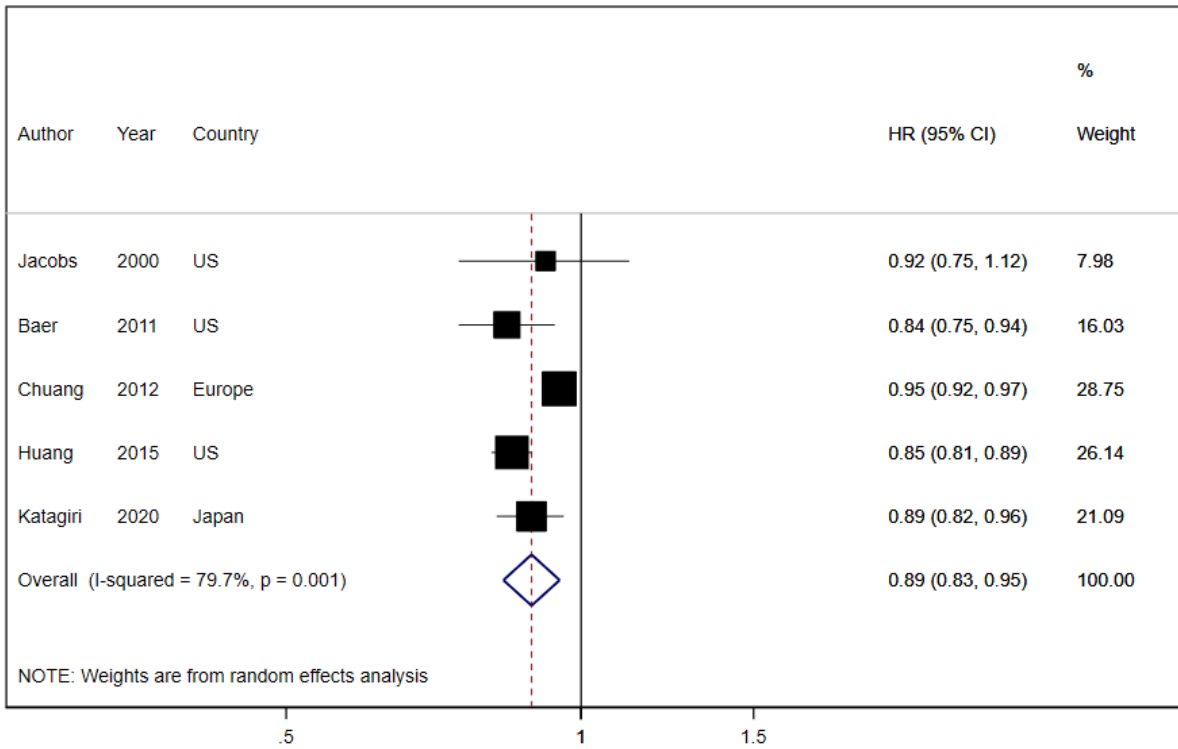

**Supplemental Figure 7.** Hazard ratio of cancer mortality for the highest compared with the lowest category of cereal fiber intake. HR, hazard ratio.

Supplementary Information

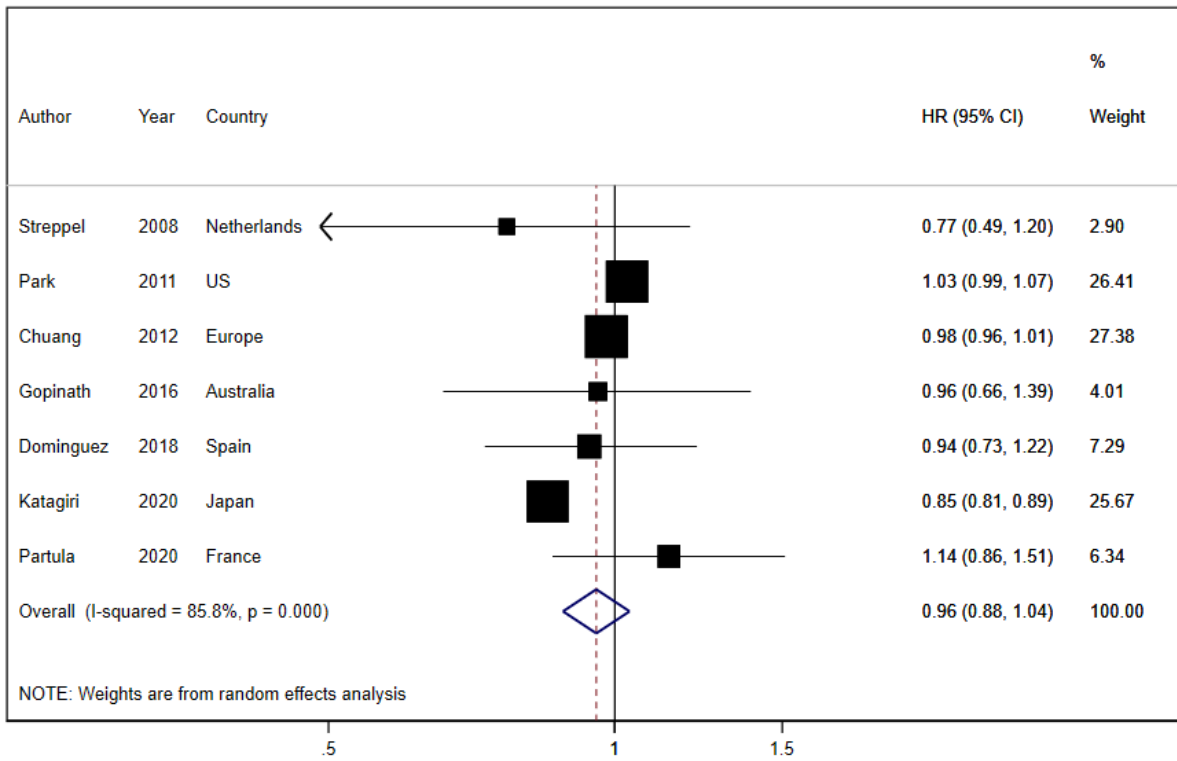

**Supplemental Figure 8.** Hazard ratio of all-cause mortality for the highest compared with the lowest category of fruit fiber intake. HR, hazard ratio.

Supplementary Information

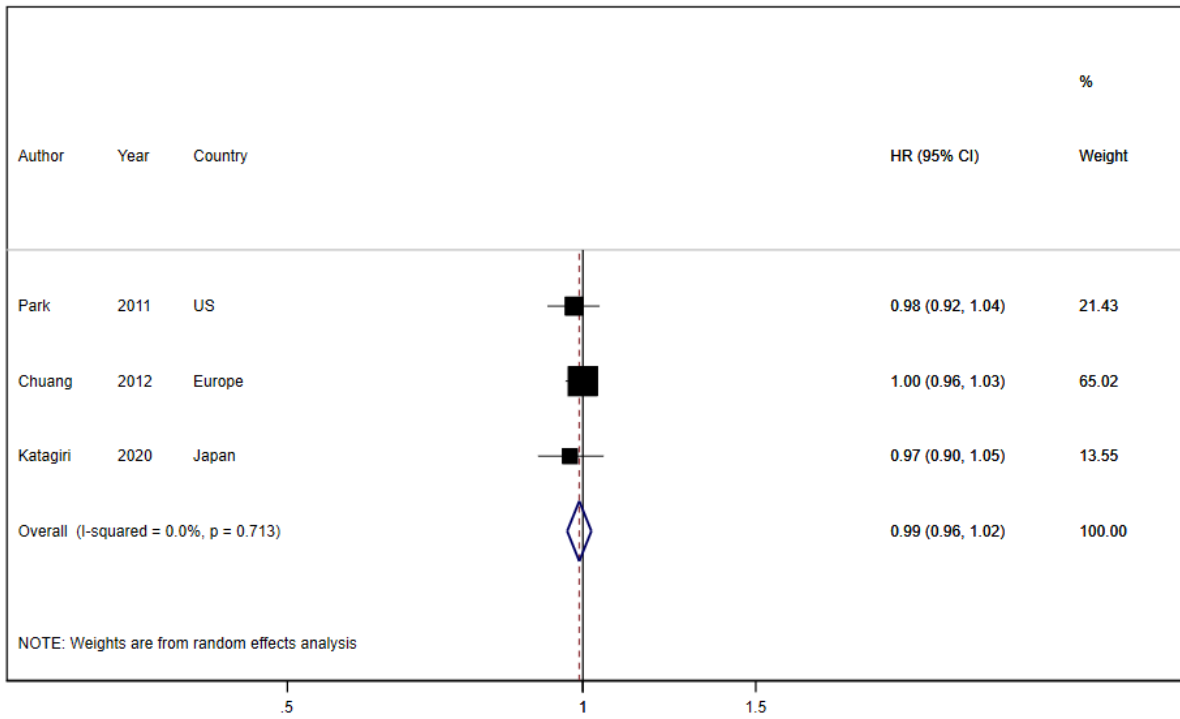

**Supplemental Figure 9.** Hazard ratio of cancer mortality for the highest compared with the lowest category of fruit fiber intake. HR, hazard ratio.

Supplementary Information

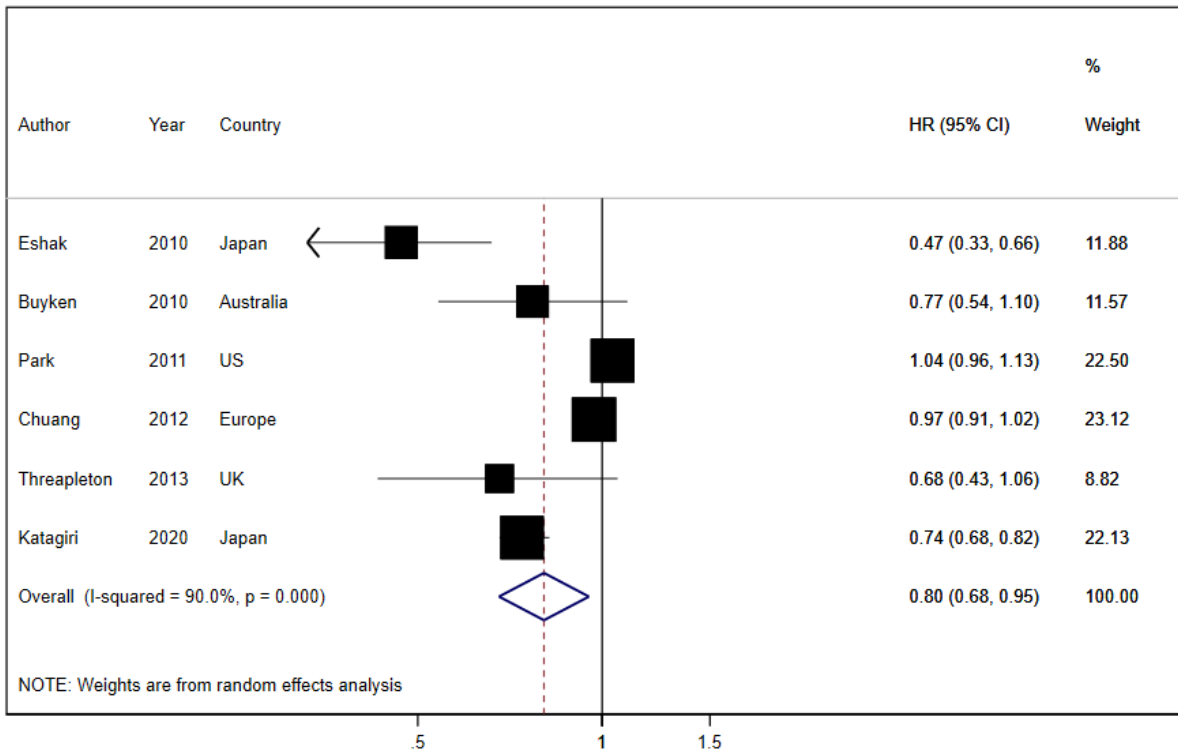

**Supplemental Figure 10.** Hazard ratio of cardiovascular mortality for the highest compared with the lowest category of fruit fiber intake. HR, hazard ratio.



Supplementary Information

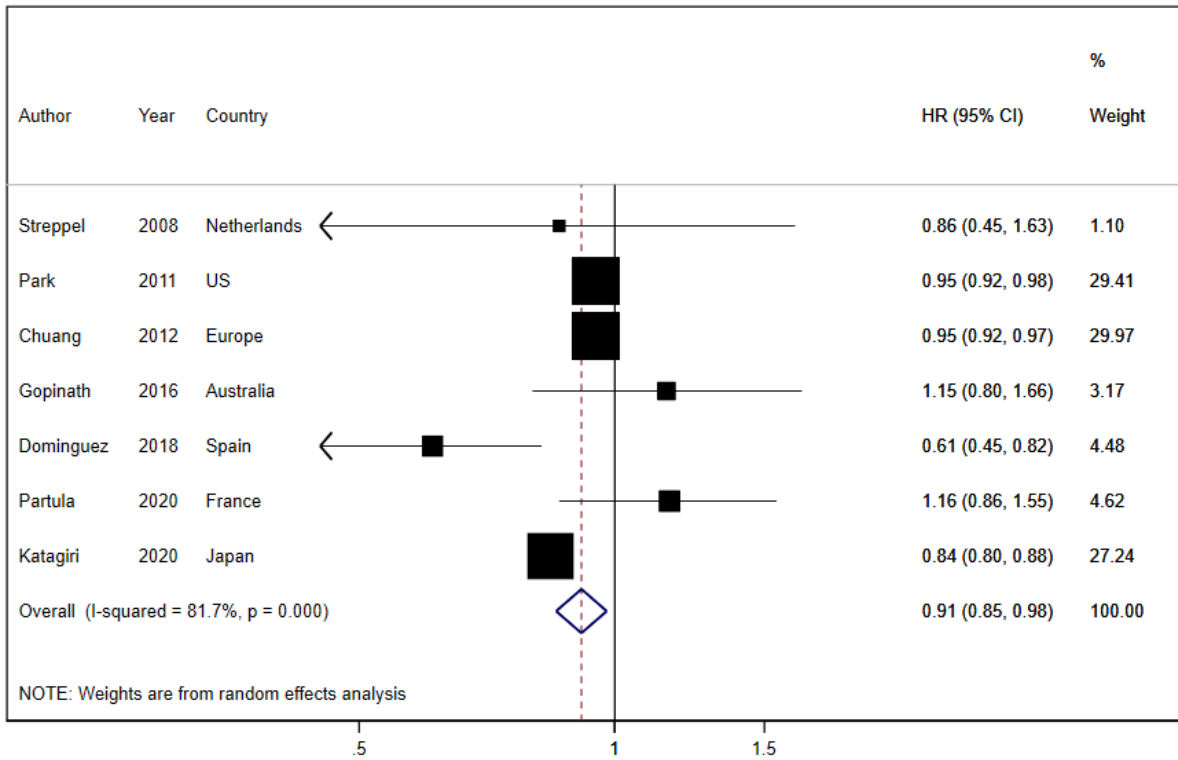

**Supplemental Figure 11.** Hazard ratio of all-cause mortality for the highest compared with the lowest category of vegetable fiber intake. HR, hazard ratio.

Supplementary Information

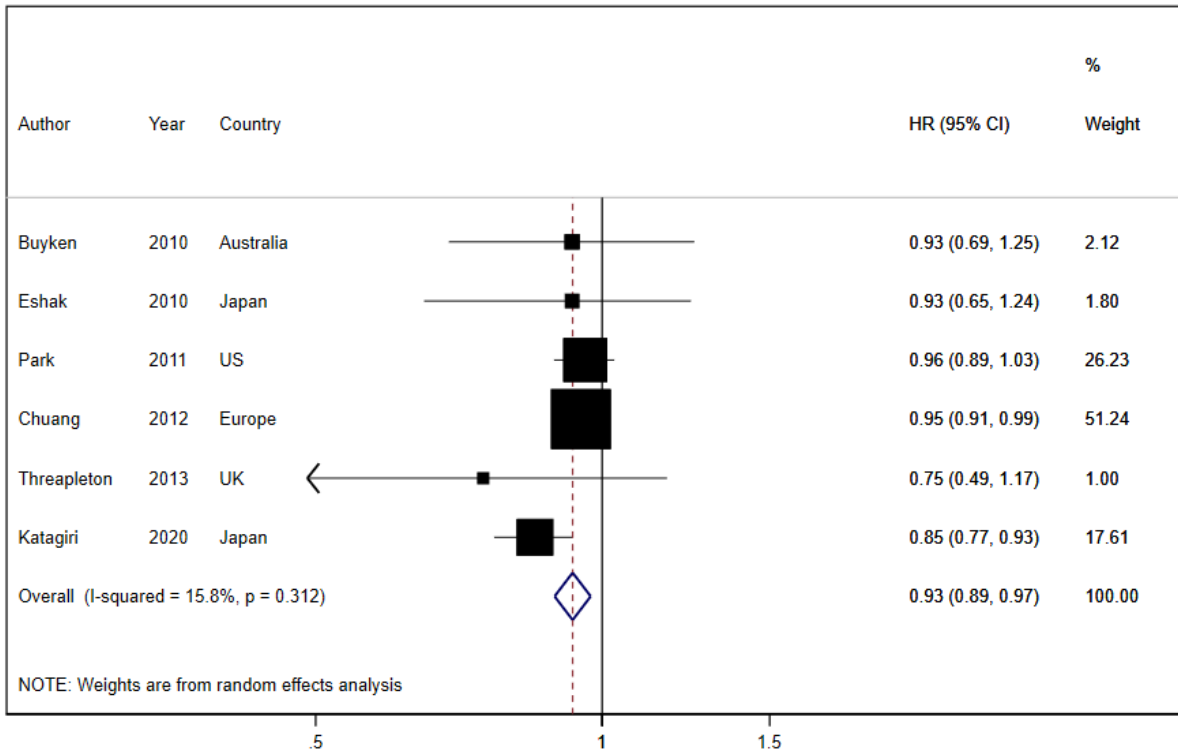

**Supplemental Figure 12.** Hazard ratio of cardiovascular mortality for the highest compared with the lowest category of vegetable fiber intake. HR, hazard ratio.

Supplementary Information

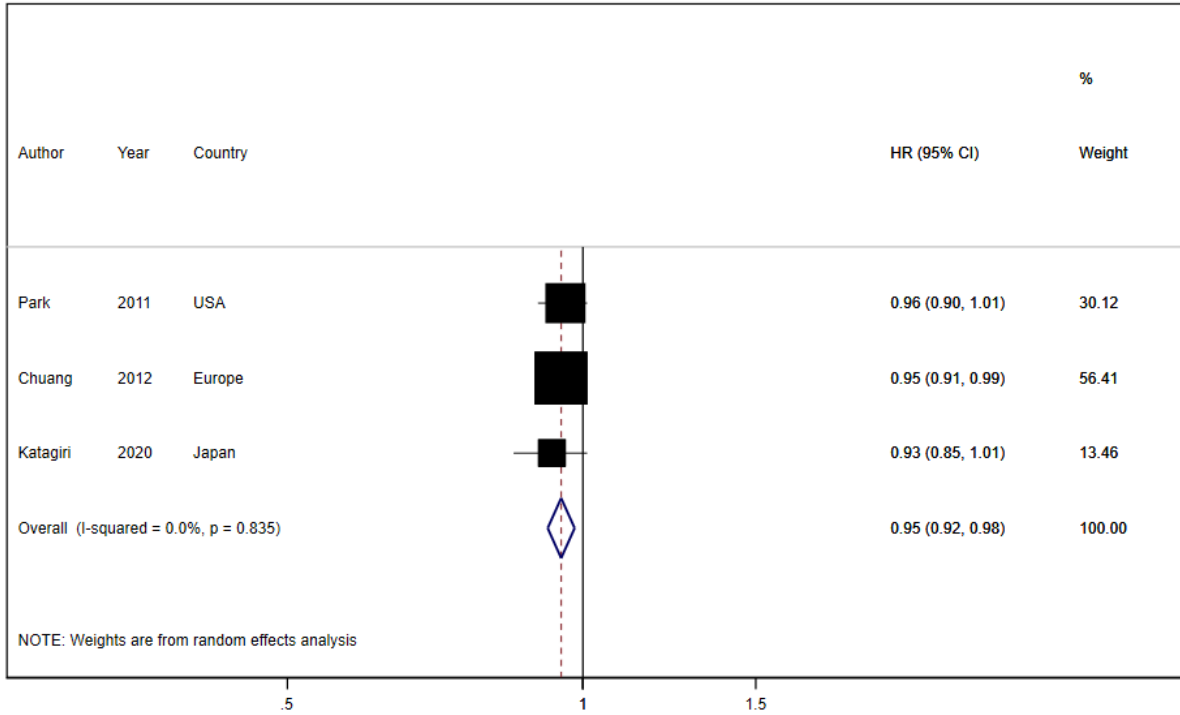

**Supplemental Figure 13.** Hazard ratio of cancer mortality for the highest compared with the lowest category of vegetable fiber intake. HR, hazard ratio.

Supplementary Information

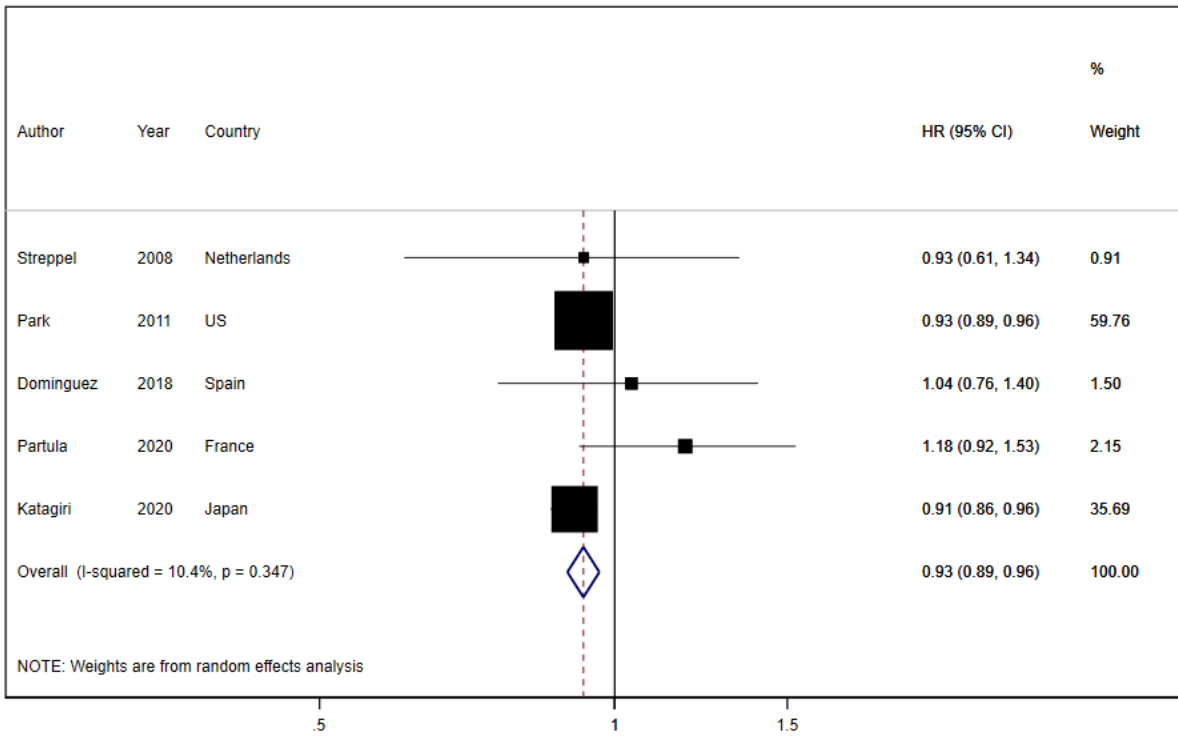

**Supplemental Figure 14.** Hazard ratio of all-cause mortality for the highest compared with the lowest category of legumes fiber intake. HR, hazard ratio

Supplementary Information

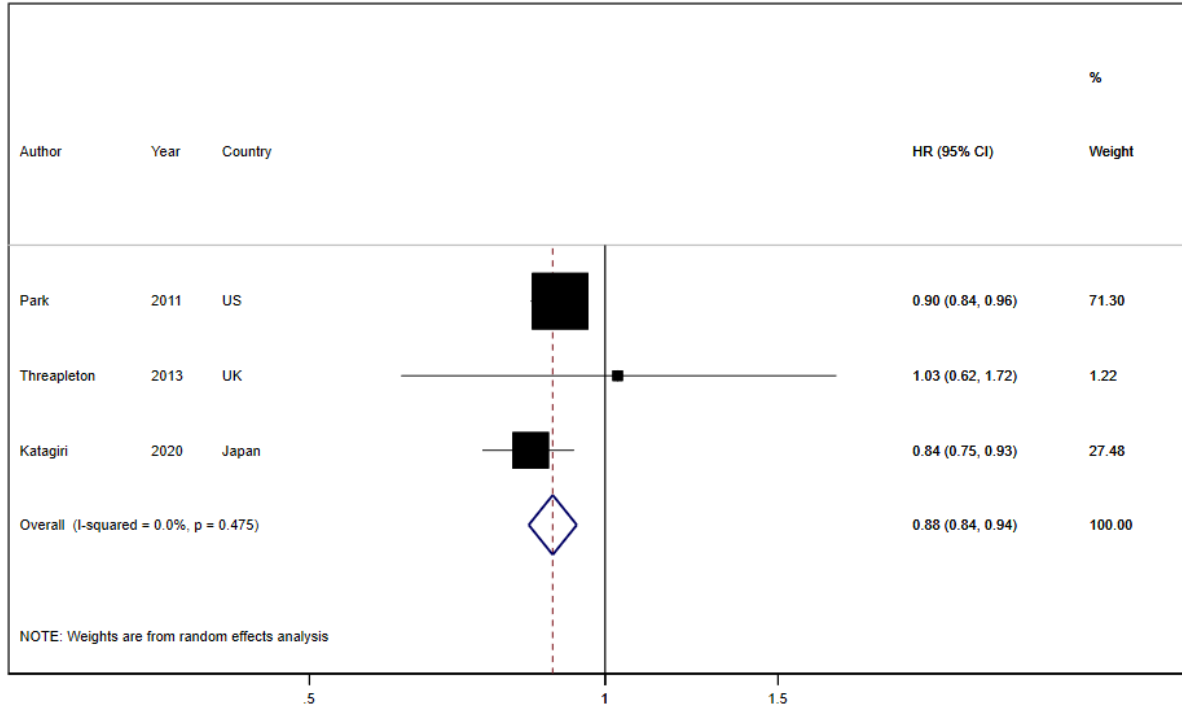

**Supplemental Figure 15.** Hazard ratio of cardiovascular mortality for the highest compared with the lowest category of legumes fiber intake. HR, hazard ratio.

Supplementary Information

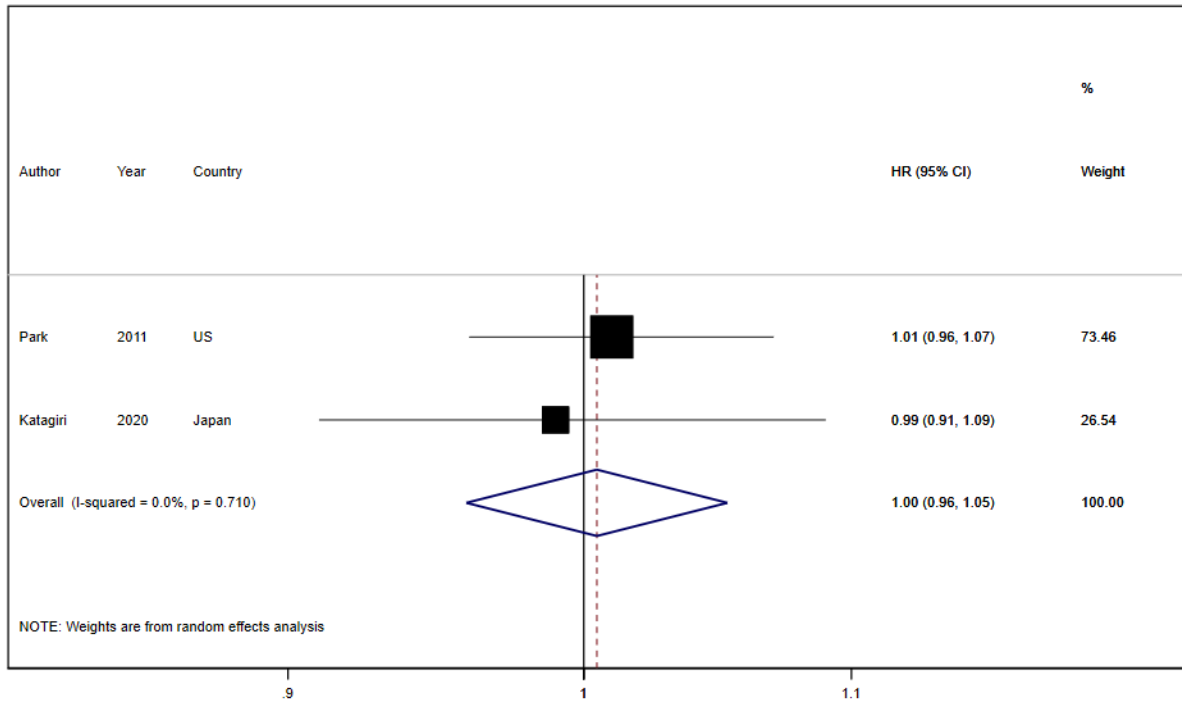

**Supplemental Figure 16.** Hazard ratio of cancer mortality for the highest compared with the lowest category of legumes fiber intake. HR, hazard ratio.

Supplementary Information

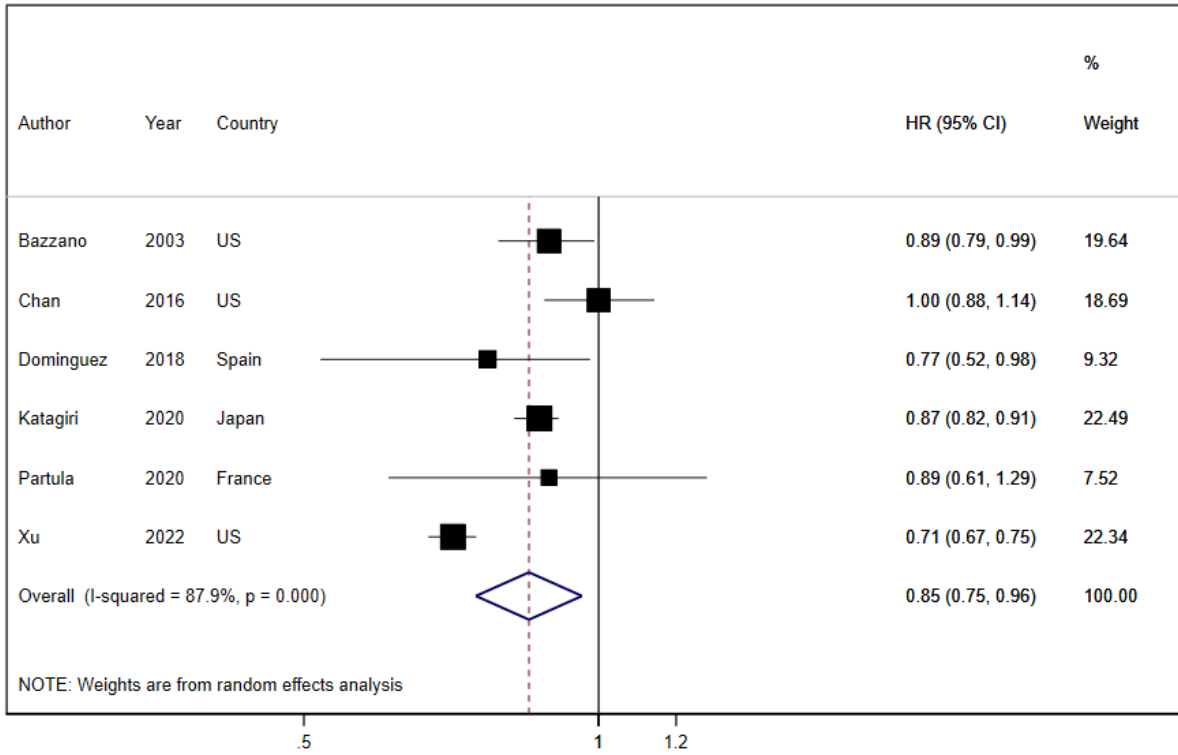

**Supplemental Figure 17.** Hazard ratio of all-cause mortality for the highest versus lowest category of soluble fiber intake. HR, hazard ratio.

Supplementary Information

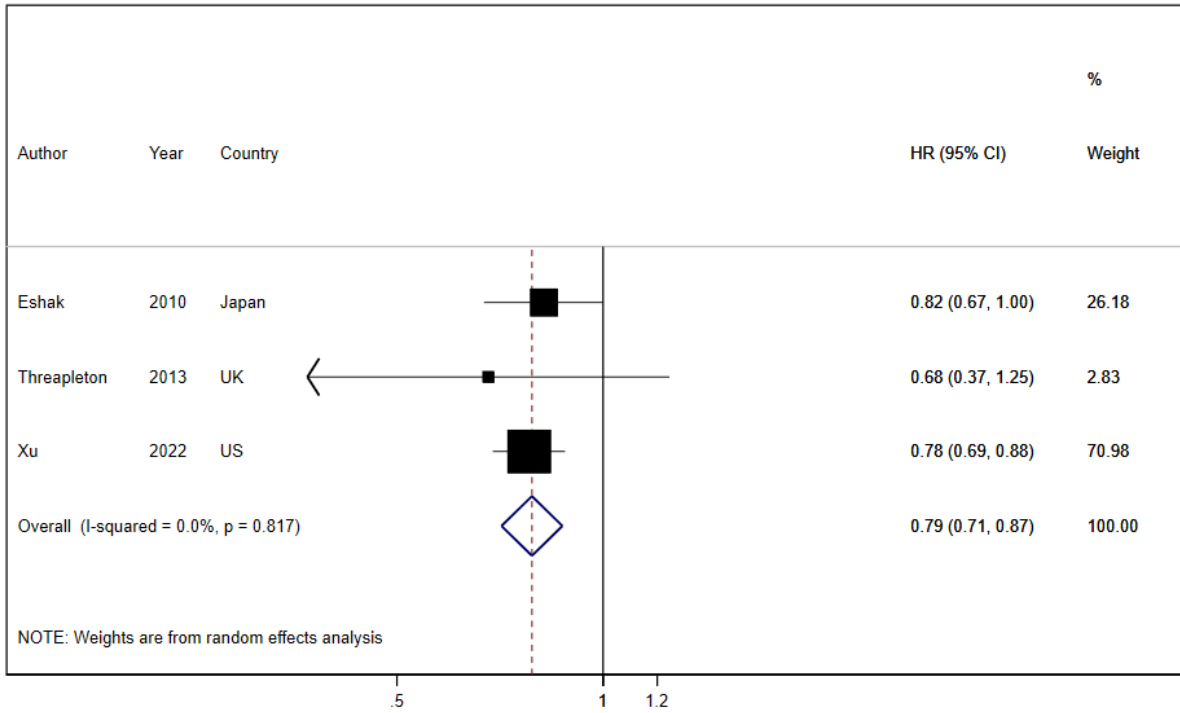

**Supplemental Figure 18.** Hazard ratio of cardiovascular mortality for the highest versus lowest category of soluble fiber intake. HR, hazard ratio.



Supplementary Information

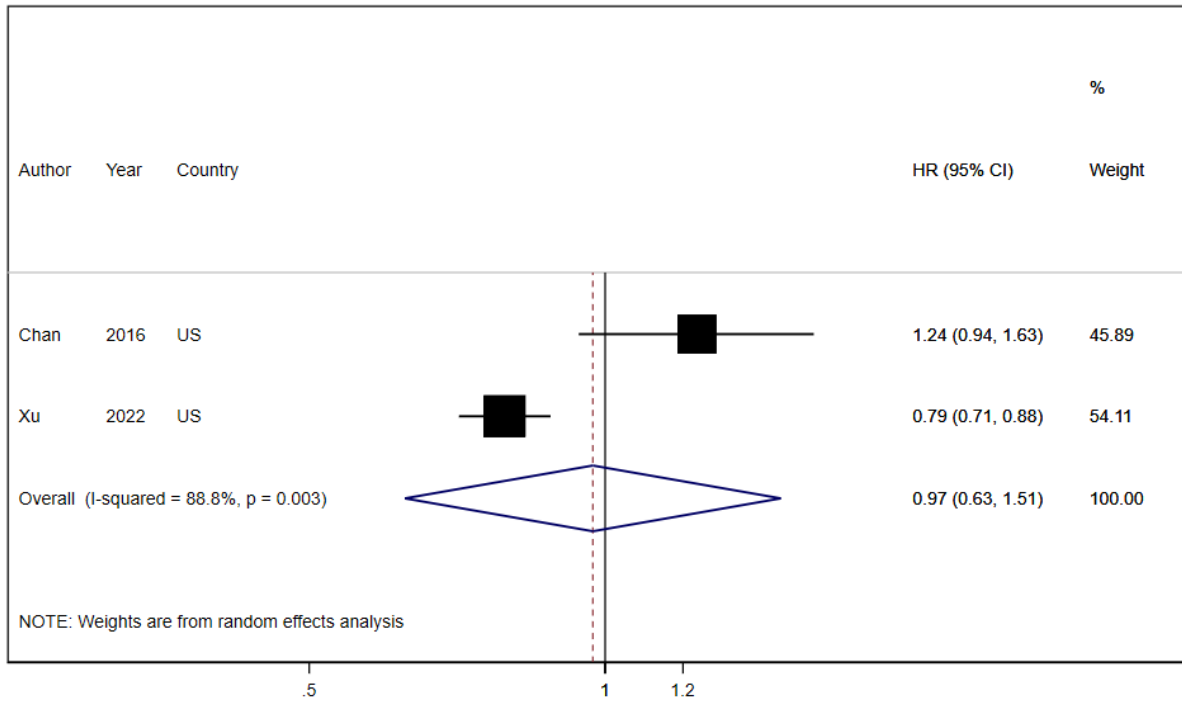

**Supplemental Figure 19.** Hazard ratio of cancer mortality for the highest versus lowest category of soluble fiber intake. HR, hazard ratio.

Supplementary Information

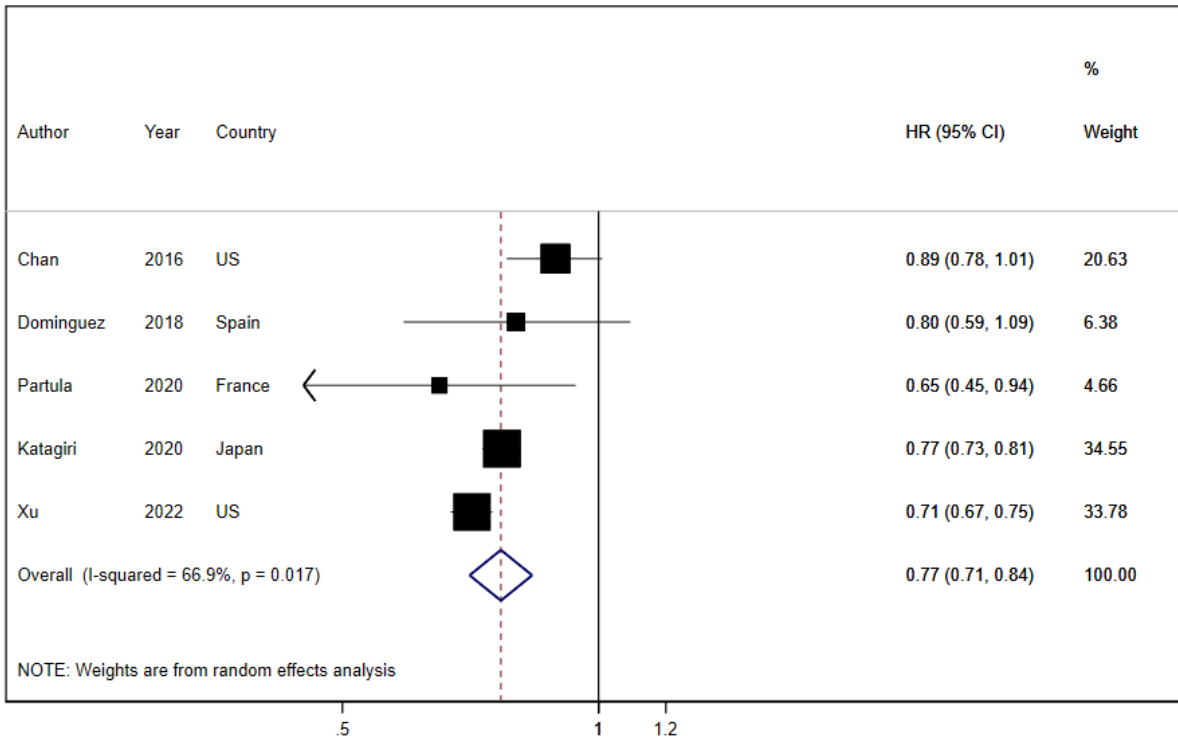

**Supplemental Figure 20.** Hazard ratio of all-cause mortality the highest versus lowest category of insoluble fiber intake. HR, hazard ratio.

Supplementary Information

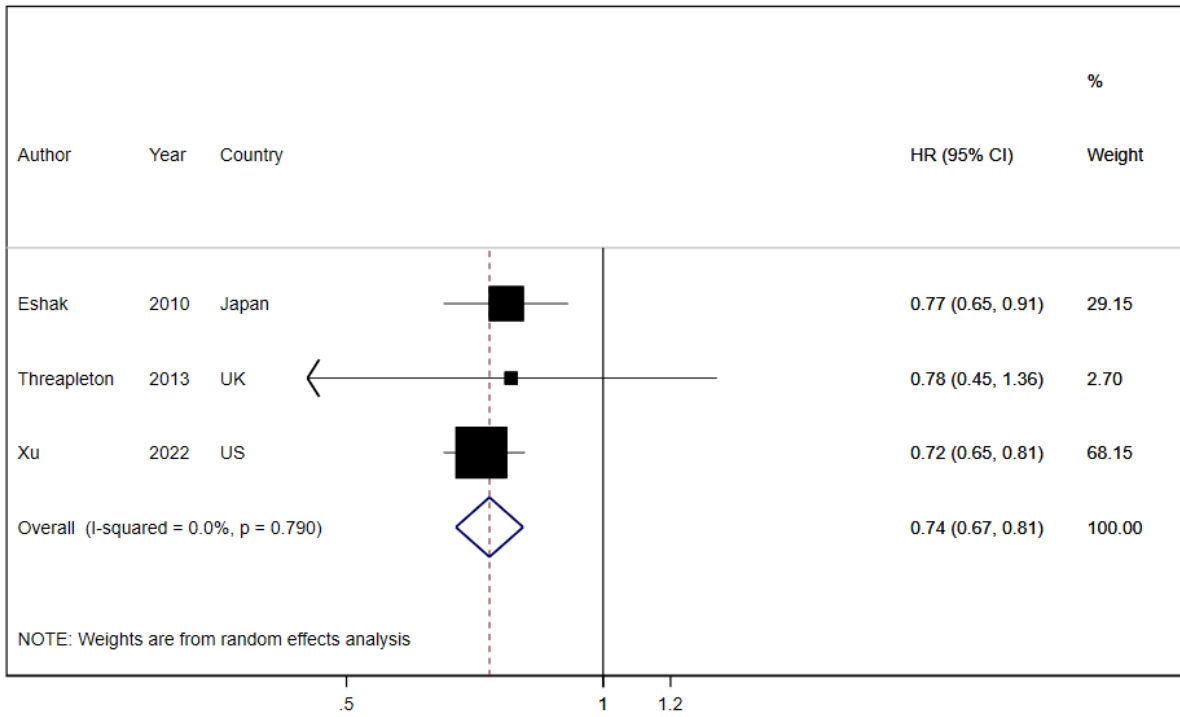

**Supplemental Figure 21.** Hazard ratio of cardiovascular mortality the highest versus lowest category of insoluble fiber intake. HR, hazard ratio.

Supplementary Information

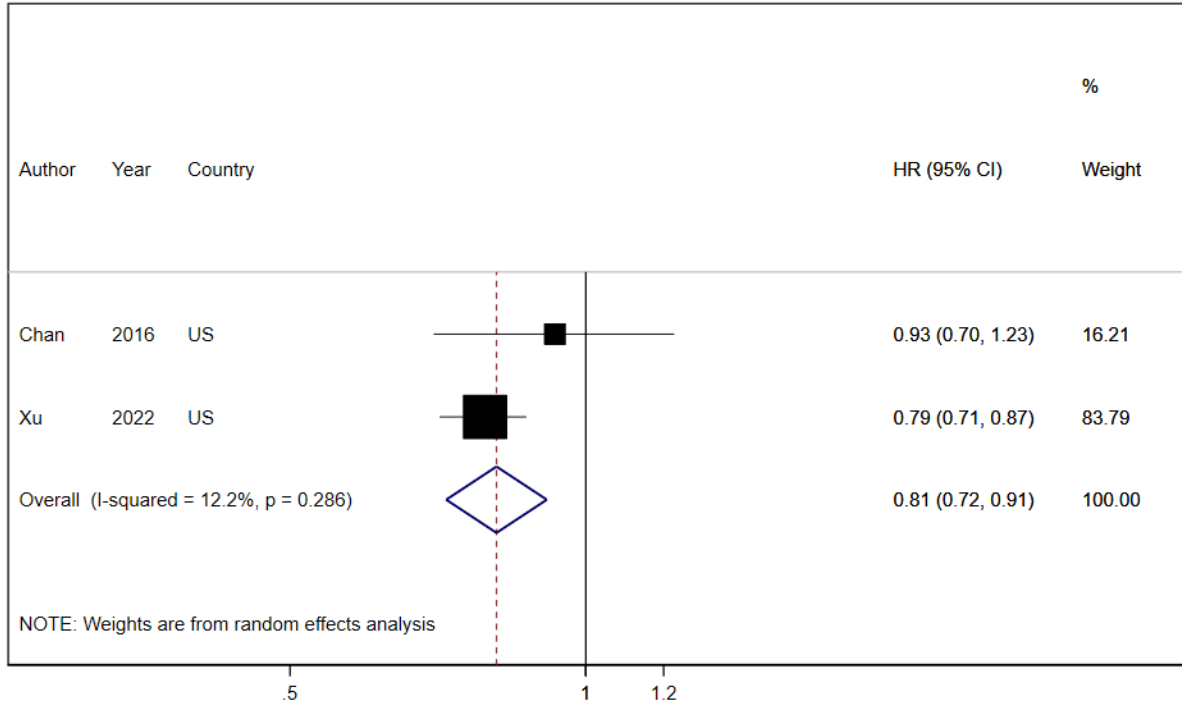

**Supplemental Figure 22.** Hazard ratio of cancer mortality the highest versus lowest category of insoluble fiber intake. HR, hazard ratio.

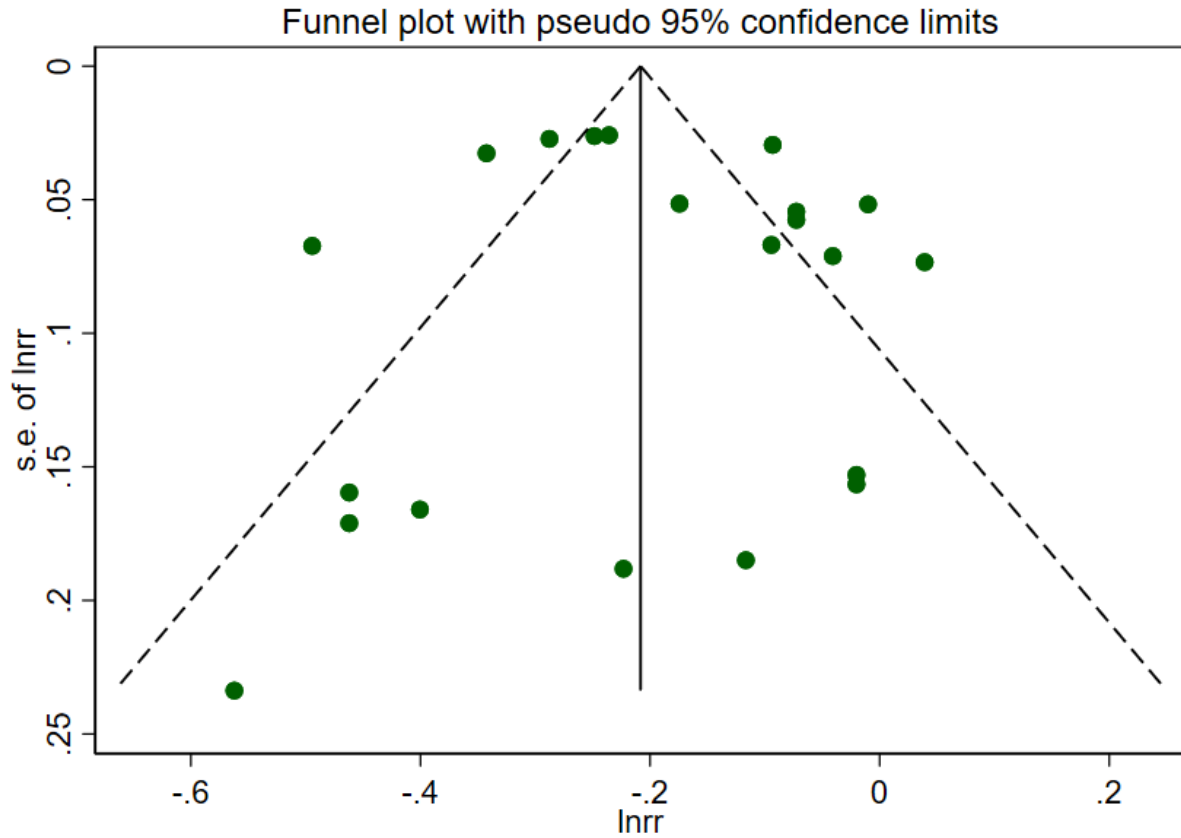

**Supplemental Figure 23.** Funnel plot of the relative risks of all-cause mortality for total fiber intake. Egger's test  $P=0.55$ .

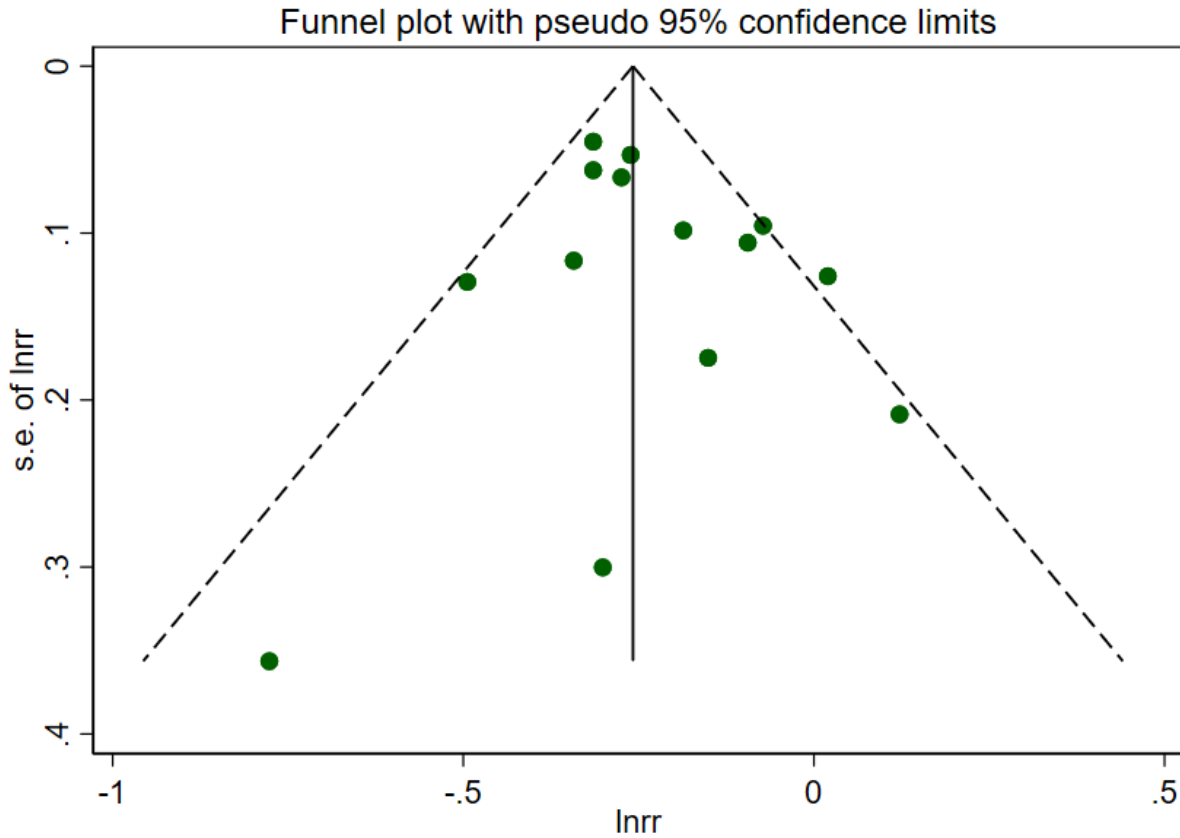

**Supplemental Figure 24.** Funnel plot of the relative risks of cardiovascular mortality for total fiber intake. Egger's test  $P=0.38$ .

**Supplemental References:**

1. Rissanen TH, Voutilainen S, Virtanen JK, Venho B, Vanharanta M, Mursu J, et al. Low intake of fruits, berries and vegetables is associated with excess mortality in men: the Kuopio Ischaemic Heart Disease Risk Factor (KIHD) Study. *J Nutr.* 2003;133(1):199-204.
2. Hjartåker A, Knudsen MD, Tretli S, Weiderpass E. Consumption of berries, fruits and vegetables and mortality among 10,000 Norwegian men followed for four decades. *Eur J Nutr.* 2015;54(4):599-608.
3. Stefler D, Pikhart H, Kubinova R, Pajak A, Stepaniak U, Malyutina S, et al. Fruit and vegetable consumption and mortality in Eastern Europe: Longitudinal results from the Health, Alcohol and Psychosocial Factors in Eastern Europe study. *Eur J Prev Cardiol.* 2016;23(5):493-501.
4. Zhang X, Shu X-O, Xiang Y-B, Yang G, Li H, Gao J, et al. Cruciferous vegetable consumption is associated with a reduced risk of total and cardiovascular disease mortality. *The American journal of clinical nutrition.* 2011;94(1):240-6.
5. Steffen LM, Jacobs DR, Jr., Stevens J, Shahar E, Carithers T, Folsom AR. Associations of whole-grain, refined-grain, and fruit and vegetable consumption with risks of all-cause mortality and incident coronary artery disease and ischemic stroke: the Atherosclerosis Risk in Communities (ARIC) Study. *Am J Clin Nutr.* 2003;78(3):383-90.
6. Boggs DA, Ban Y, Palmer JR, Rosenberg L. Higher diet quality is inversely associated with mortality in African-American women. *J Nutr.* 2015;145(3):547-54.
7. Liu S, Sesso HD, Manson JE, Willett WC, Buring JE. Is intake of breakfast cereals related to total and cause-specific mortality in men? *Am J Clin Nutr.* 2003;77(3):594-9.
8. van den Brandt PA. The impact of a Mediterranean diet and healthy lifestyle on premature mortality in men and women. *Am J Clin Nutr.* 2011;94(3):913-20.
9. Tognon G, Rothenberg E, Eiben G, Sundh V, Winkvist A, Lissner L. Does the Mediterranean diet predict longevity in the elderly? A Swedish perspective. *Age (Dordr).* 2011;33(3):439-50.
10. Jacobs DR, Jr., Meyer HE, Solvoll K. Reduced mortality among whole grain bread eaters in men and women in the Norwegian County Study. *Eur J Clin Nutr.* 2001;55(2):137-43.
11. Knoops KT, Groot de LC, Fidanza F, Alberti-Fidanza A, Kromhout D, van Staveren WA. Comparison of three different dietary scores in relation to 10-year mortality in elderly European subjects: the HALE project. *Eur J Clin Nutr.* 2006;60(6):746-55.
12. Vormund K, Braun J, Rohrmann S, Bopp M, Ballmer P, Faeh D. Mediterranean diet and mortality in Switzerland: an alpine paradox? *Eur J Nutr.* 2015;54(1):139-48.
13. Key TJ, Thorogood M, Appleby PN, Burr ML. Dietary habits and mortality in 11,000 vegetarians and health conscious people: results of a 17 year follow up. *Bmj.* 1996;313(7060):775-9.
14. Trichopoulou A, Kouris-Blazos A, Wahlqvist ML, Gnardellis C, Lagiou P, Polychronopoulos E, et al. Diet and overall survival in elderly people. *Bmj.* 1995;311(7018):1457-60.
15. Bongard V, Arveiler D, Dallongeville J, Ruidavets JB, Wagner A, Simon C, et al. Food groups associated with a reduced risk of 15-year all-cause death. *Eur J Clin Nutr.* 2016;70(6):715-22.
16. Choi Y, Lee JE, Bae J-M, Li Z-M, Kim D-H, Lee M-S, et al. Vegetable Intake, but Not Fruit Intake, Is Associated with a Reduction in the Risk of Cancer Incidence and Mortality in Middle-Aged Korean Men. *The Journal of Nutrition.* 2015;145(6):1249-55.
17. Clark ML, Butler LM, Koh WP, Wang R, Yuan JM. Dietary fiber intake modifies the association between secondhand smoke exposure and coronary heart disease mortality among Chinese non-smokers in Singapore. *Nutrition.* 2013;29(11-12):1304-9.
18. Wang J-B, Fan J-H, Dawsey SM, Sinha R, Freedman ND, Taylor PR, et al. Dietary components and risk of total, cancer and cardiovascular disease mortality in the Linxian Nutrition Intervention Trials cohort in China. *Sci Rep.* 2016;6:22619-.

## Supplementary Information

19. Whiteman D, Muir J, Jones L, Murphy M, Key T. Dietary questions as determinants of mortality: the OXCHECK experience. *Public Health Nutr.* 1999;2(4):477-87.
20. Fraser GE, Shavlik DJ. Risk factors for all-cause and coronary heart disease mortality in the oldest-old. *The Adventist Health Study. Arch Intern Med.* 1997;157(19):2249-58.
21. Nguyen B, Bauman A, Gale J, Banks E, Kritharides L, Ding D. Fruit and vegetable consumption and all-cause mortality: evidence from a large Australian cohort study. *Int J Behav Nutr Phys Act.* 2016;13:9.
22. Hays JC, Keller HH, Ostbye T. The effects of nutrition-related factors on four-year mortality among a biracial sample of community-dwelling elders in the North Carolina piedmont. *J Nutr Elder.* 2005;25(2):41-67.
23. Oyeboode O, Gordon-Dseagu V, Walker A, Mindell JS. Fruit and vegetable consumption and all-cause, cancer and CVD mortality: analysis of Health Survey for England data. *J Epidemiol Community Health.* 2014;68(9):856-62.
24. Johnsen NF, Frederiksen K, Christensen J, Skeie G, Lund E, Landberg R, et al. Whole-grain products and whole-grain types are associated with lower all-cause and cause-specific mortality in the Scandinavian HELGA cohort. *Br J Nutr.* 2015;114(4):608-23.
25. Sotos-Prieto M, Mattei J, Cook NR, Hu FB, Willett WC, Chiuve SE, et al. Association Between a 20-Year Cardiovascular Disease Risk Score Based on Modifiable Lifestyles and Total and Cause-Specific Mortality Among US Men and Women. *J Am Heart Assoc.* 2018;7(21):e010052.
26. Kahn HA, Phillips RL, Snowdon DA, Choi W. Association between reported diet and all-cause mortality. Twenty-one-year follow-up on 27,530 adult Seventh-Day Adventists. *Am J Epidemiol.* 1984;119(5):775-87.
27. Kvaavik E, Batty GD, Ursin G, Huxley R, Gale CR. Influence of individual and combined health behaviors on total and cause-specific mortality in men and women: the United Kingdom health and lifestyle survey. *Arch Intern Med.* 2010;170(8):711-8.
28. Genkinger JM, Platz EA, Hoffman SC, Comstock GW, Helzlsouer KJ. Fruit, vegetable, and antioxidant intake and all-cause, cancer, and cardiovascular disease mortality in a community-dwelling population in Washington County, Maryland. *Am J Epidemiol.* 2004;160(12):1223-33.
29. Leenders M, Sluijs I, Ros MM, Boshuizen HC, Siersema PD, Ferrari P, et al. Fruit and vegetable consumption and mortality: European prospective investigation into cancer and nutrition. *Am J Epidemiol.* 2013;178(4):590-602.
30. Lai HT, Threapleton DE, Day AJ, Williamson G, Cade JE, Burley VJ. Fruit intake and cardiovascular disease mortality in the UK Women's Cohort Study. *Eur J Epidemiol.* 2015;30(9):1035-48.
31. Wu H, Flint AJ, Qi Q, van Dam RM, Sampson LA, Rimm EB, et al. Association between dietary whole grain intake and risk of mortality: two large prospective studies in US men and women. *JAMA Intern Med.* 2015;175(3):373-84.
32. Shi Z, Zhang T, Byles J, Martin S, Avery JC, Taylor AW. Food Habits, Lifestyle Factors and Mortality among Oldest Old Chinese: The Chinese Longitudinal Healthy Longevity Survey (CLHLS). *Nutrients.* 2015;7(9):7562-79.
33. Miller V, Mente A, Dehghan M, Rangarajan S, Zhang X, Swaminathan S, et al. Fruit, vegetable, and legume intake, and cardiovascular disease and deaths in 18 countries (PURE): A prospective cohort study. *The Lancet.* 2017;390.
34. Nechuta SJ, Shu XO, Li HL, Yang G, Xiang YB, Cai H, et al. Combined impact of lifestyle-related factors on total and cause-specific mortality among Chinese women: prospective cohort study. *PLoS Med.* 2010;7(9).
35. Yu D, Sonderman J, Buchowski MS, McLaughlin JK, Shu XO, Steinwandel M, et al. Healthy Eating and Risks of Total and Cause-Specific Death among Low-Income Populations of African-Americans and



## Supplementary Information

Other Adults in the Southeastern United States: A Prospective Cohort Study. *PLoS Med.* 2015;12(5):e1001830; discussion e.

36. Rotevatn S, Akslen LA, Bjelke E. Lifestyle and mortality among Norwegian men. *Prev Med.* 1989;18(4):433-43.

37. Sahyoun NR, Jacques PF, Zhang XL, Juan W, McKeown NM. Whole-grain intake is inversely associated with the metabolic syndrome and mortality in older adults. *Am J Clin Nutr.* 2006;83(1):124-31.

38. Jacobs DR, Jr., Andersen LF, Blomhoff R. Whole-grain consumption is associated with a reduced risk of noncardiovascular, noncancer death attributed to inflammatory diseases in the Iowa Women's Health Study. *Am J Clin Nutr.* 2007;85(6):1606-14.

39. Hertog MG, Bueno-de-Mesquita HB, Fehily AM, Sweetnam PM, Elwood PC, Kromhout D. Fruit and vegetable consumption and cancer mortality in the Caerphilly Study. *Cancer Epidemiol Biomarkers Prev.* 1996;5(9):673-7.

40. Kouris-Blazos A, Gnardellis C, Wahlqvist ML, Trichopoulos D, Lukito W, Trichopoulou A. Are the advantages of the Mediterranean diet transferable to other populations? A cohort study in Melbourne, Australia. *Br J Nutr.* 1999;82(1):57-61.

41. Crowe FL, Key TJ, Appleby PN, Overvad K, Schmidt EB, Egeberg R, et al. Dietary fibre intake and ischaemic heart disease mortality: the European Prospective Investigation into Cancer and Nutrition-Heart study. *Eur J Clin Nutr.* 2012;66(8):950-6.

42. Liu S, Buring JE, Sesso HD, Rimm EB, Willett WC, Manson JE. A prospective study of dietary fiber intake and risk of cardiovascular disease among women. *J Am Coll Cardiol.* 2002;39(1):49-56.

43. Khaw KT, Barrett-Connor E. Dietary fiber and reduced ischemic heart disease mortality rates in men and women: a 12-year prospective study. *Am J Epidemiol.* 1987;126(6):1093-102.

44. Rebello SA, Koh H, Chen C, Naidoo N, Odegaard AO, Koh WP, et al. Amount, type, and sources of carbohydrates in relation to ischemic heart disease mortality in a Chinese population: a prospective cohort study. *Am J Clin Nutr.* 2014;100(1):53-64.

45. Tucker KL, Hallfrisch J, Qiao N, Muller D, Andres R, Fleg JL. The combination of high fruit and vegetable and low saturated fat intakes is more protective against mortality in aging men than is either alone: the Baltimore Longitudinal Study of Aging. *J Nutr.* 2005;135(3):556-61.

46. Yang Y, Zhao LG, Wu QJ, Ma X, Xiang YB. Association between dietary fiber and lower risk of all-cause mortality: a meta-analysis of cohort studies. *Am J Epidemiol.* 2015;181(2):83-91.

47. Hajishafiee M, Saneei P, Benisi-Kohansal S, Esmailzadeh A. Cereal fibre intake and risk of mortality from all causes, CVD, cancer and inflammatory diseases: a systematic review and meta-analysis of prospective cohort studies. *Br J Nutr.* 2016;116(2):343-52.

48. Gunashekar DR, Singh RB, Niaz MA, Shewale AR, Takahashi T, Chauhan AK, et al. Chapter 6 - Dietary Fiber and Risk of Cardiovascular Diseases. In: Samaan RA, editor. *Dietary Fiber for the Prevention of Cardiovascular Disease*: Academic Press; 2017. p. 91-120.

49. Kim Y, Je Y. Dietary fiber intake and total mortality: a meta-analysis of prospective cohort studies. *Am J Epidemiol.* 2014;180(6):565-73.

50. Kim Y, Je Y. Dietary fibre intake and mortality from cardiovascular disease and all cancers: A meta-analysis of prospective cohort studies. *Arch Cardiovasc Dis.* 2016;109(1):39-54.

51. Reynolds A, Mann J, Cummings J, Winter N, Mete E, Te Morenga L. Carbohydrate quality and human health: a series of systematic reviews and meta-analyses. *Lancet.* 2019;393(10170):434-45.

52. Burr ML, Sweetnam PM. Vegetarianism, dietary fiber, and mortality. *Am J Clin Nutr.* 1982;36(5):873-7.

53. Kromhout D, Bloemberg BP, Feskens EJ, Hertog MG, Menotti A, Blackburn H. Alcohol, fish, fibre and antioxidant vitamins intake do not explain population differences in coronary heart disease mortality. *Int J Epidemiol.* 1996;25(4):753-9.

54. Kromhout D, Bosschieter EB, de Lezenne Coulander C. Dietary fibre and 10-year mortality from coronary heart disease, cancer, and all causes. The Zutphen study. *Lancet*. 1982;2(8297):518-22.
55. Kromhout D, de Lezenne Coulander C. Diet, prevalence and 10-year mortality from coronary heart disease in 871 middle-aged men. The Zutphen Study. *Am J Epidemiol*. 1984;119(5):733-41.
56. Fernandez-Lazaro C, Zazpe I, Santiago S, Toledo E, Barbería-Latasa M, Alez M. Association of carbohydrate quality and all-cause mortality in the SUN Project: A prospective cohort study. *Clinical Nutrition*. 2020.
57. Jankovic N, Geelen A, Streppel MT, de Groot LC, Kieft-de Jong JC, Orfanos P, et al. WHO guidelines for a healthy diet and mortality from cardiovascular disease in European and American elderly: the CHANCES project. *Am J Clin Nutr*. 2015;102(4):745-56.
58. Jankovic N, Geelen A, Streppel MT, de Groot LCPGM, Orfanos P, van den Hooven EH, et al. Adherence to a healthy diet according to the World Health Organization guidelines and all-cause mortality in elderly adults from Europe and the United States. *Am J Epidemiol*. 2014;180(10):978-88.
59. Xu M, Huang T, Lee AW, Qi L, Cho S. Ready-to-Eat Cereal Consumption with Total and Cause-Specific Mortality: Prospective Analysis of 367,442 Individuals. *J Am Coll Nutr*. 2016;35(3):217-23.
60. Ricci C, Leitzmann MF, Freisling H, Schutte AE, Schutte R, Kruger SH, et al. Diet and sedentary behaviour in relation to mortality in US adults with a cardiovascular condition: results from the National Health and Nutrition Examination Survey linked to the US mortality registry. *Br J Nutr*. 2020;124(12):1329-37.
